1 **Reliability assessment of temporal discounting measures in**  
2 **virtual reality environments**

3 Luca R. Bruder<sup>\*</sup>, Lisa Scharer, Jan Peters

4 Department of Psychology, Biological Psychology, University of Cologne, Germany

5 **\* Corresponding author**

6 **Contact: [lbruder@uni-koeln.de](mailto:lbruder@uni-koeln.de), [jan.peters@uni-koeln.de](mailto:jan.peters@uni-koeln.de)**

7 **Abstract**

8 In recent years the emergence of high-performance virtual reality (VR) technology has  
9 opened up new possibilities for the examination of context effects in psychological studies.  
10 The opportunity to create ecologically valid stimulation in a highly controlled lab  
11 environment is especially relevant for studies of psychiatric disorders, where it can be  
12 problematic to confront participants with certain stimuli in real life. However, before VR can  
13 be confidently applied widely it is important to establish that commonly used behavioral tasks  
14 generate reliable data within a VR surrounding. One field of research that could benefit  
15 greatly from VR-applications are studies assessing the reactivity to addiction related cues  
16 (cue-reactivity) in participants suffering from gambling disorder. Here we tested the reliability  
17 of a commonly used temporal discounting task in a novel VR set-up designed for the  
18 concurrent assessment of behavioral and psychophysiological cue-reactivity in gambling  
19 disorder. On two days, thirty-four healthy non-gambling participants explored two rich and  
20 navigable VR-environments (neutral: café vs. gambling-related: casino and sports-betting  
21 facility), while their electrodermal activity was measured using remote sensors. In addition,  
22 participants completed the temporal discounting task implemented in each VR environment.  
23 On a third day, participants performed the task in a standard lab testing context. We then used  
24 comprehensive computational modeling using both standard softmax and drift diffusion  
25 model (DDM) choice rules to assess the reliability of discounting model parameters assessed  
26 in VR. Test-retest reliability estimates were good to excellent for the discount rate  $\log(k)$ ,  
27 whereas they were poor to moderate for additional DDM parameters. Differences in model  
28 parameters between standard lab testing and VR, reflecting reactivity to the different  
29 environments, were mostly numerically small and of inconclusive directionality. Finally,  
30 while exposure to VR generally increased tonic skin conductance, this effect was not  
31 modulated by the neutral vs. gambling-related VR-environment. Taken together this proof-of-  
32 concept study in non-gambling participants demonstrates that temporal discounting measures  
33 obtained in VR are reliable, suggesting that VR is a promising tool for applications in  
34 computational psychiatry, including studies on cue-reactivity in addiction.

35

## 36 **Introduction**

37 Recent research has exploited the development of high-performance virtual reality (VR)  
38 technology to increase the ecological validity of stimuli presented in studies of cue-  
39 exposure<sup>[1-3]</sup>, counterconditioning<sup>[4]</sup>, equilibrium training<sup>[5]</sup>, social gazing<sup>[6]</sup> and gambling  
40 behavior in healthy control participants<sup>[7]</sup>. Furthermore, it has been shown to increase  
41 immersion and arousal during gambling games<sup>[8]</sup>. However, before VR can be widely applied  
42 with confidence it is important to establish that commonly applied behavioral tasks still yield  
43 reliable data in a VR context. Research focusing on psychiatric disorders, where one goal is to  
44 create reliable diagnostic markers based behavioral tasks and model-based computational  
45 approaches, would benefit from behavioral tasks that produce reliable parameters on a single  
46 participant level in VR.

47 A core characteristic of many psychiatric and neurological disorders is a detrimental  
48 change in decision-making processes. This is especially evident in addiction-related disorders  
49 such as substance abuse<sup>[9-11]</sup> or gambling disorder<sup>[12-14]</sup>. One approach to study such changes  
50 in decision making is computational psychiatry<sup>[15]</sup>, which employs theoretically grounded  
51 mathematical models to examine cognitive performance in relation to psychiatric disorders.  
52 Such a model-based approach allows for a better quantification of the underlying latent  
53 processes<sup>[16]</sup>.

54 One process that has been implicated in a range of psychiatric disorders is the  
55 discounting of reward value over time (temporal discounting): both steep and shallow  
56 discounting is associated with different psychiatric conditions<sup>[9]</sup>. In temporal discounting  
57 tasks, participants make repeated choices between a fixed immediate reward and larger but  
58 temporally delayed rewards<sup>[17]</sup>. Based on binary choices and/or response time (RT)  
59 distributions, the degree to which participants discount the value of future rewards based on  
60 the temporal delay provides a measure of individual impulsivity. Increased temporal  
61 discounting is thought to be a trans-diagnostic marker with relevance for a range of  
62 psychiatric disorders<sup>[9]</sup>, with addictions and related disorders being prominent examples<sup>[18,19]</sup>.

63 There is preliminary evidence that temporal discounting might be more pronounced  
64 when addiction related cues are present. Participants who suffer from gambling disorder for  
65 instance tend to exhibit steeper discounting<sup>[12,20]</sup> and increased risk-taking<sup>[21]</sup> in the presence  
66 of gambling-related stimuli or environments. These findings resonate with theories of drug  
67 addiction such as incentive sensitization theory<sup>[22]</sup> which emphasize a prominent role for  
68 addiction-related cues in the maintenance of drug addiction (see below). Identifying the

69 mechanisms underlying such behavioral patterns and how they are modulated by addiction-  
70 related cues is essential to the planning and execution of successful interventions that aim to  
71 reverse these changes in decision-making<sup>[23,24]</sup>.

72 Accordingly, the concept of cue-reactivity plays a prominent role in research on  
73 substance use disorders<sup>[25]</sup>, but has more recently also been investigated in behavioral  
74 addictions such as gambling disorder<sup>[26]</sup>. Cue-reactivity refers to conditioned responses to  
75 addiction-related cues in the environment and is thought to play a major role in the  
76 maintenance of addiction. Cue-reactivity can manifest in behavioral measures, as described  
77 above for temporal discounting and risk-taking, but also in subjective reports and/or in  
78 physiological measures<sup>[25]</sup>. Incentive-Sensitization Theory<sup>[22,27]</sup> states that neural circuits  
79 mediating the incentive motivation to obtain a reward become over-sensitized to addiction-  
80 related cues, giving rise to craving. These motivational changes are thought to be mediated by  
81 dopaminergic pathways of the mesocorticolimbic system<sup>[28–30]</sup>. In line with this, craving  
82 following cue exposure correlates with a modulation of striatal value signals during temporal  
83 discounting<sup>[12]</sup>, and exposure to drug-related cues increases dopamine release in striatal  
84 circuits in humans<sup>[30]</sup>. While studying these mechanisms in substance use disorders is  
85 certainly of value, it is also problematic because substances might have direct effects on the  
86 underlying neural substrates. Behavioral addictions, such as gambling disorder, however,  
87 might offer a somewhat less perturbed view on the underlying mechanisms.

88 Studies probing cue-reactivity in participants suffering from gambling disorder have  
89 typically either used picture stimuli<sup>[12,13,21,31–38]</sup> or real-life gambling environments (i.e.  
90 gambling facilities)<sup>[20]</sup>. Both methods come with advantages and disadvantages. While  
91 presenting pictures in a controlled lab environment enables researchers to minimize the  
92 influence of noise factors and simplifies the assessment physiological variables, it lacks the  
93 ecological validity of real-life environments. Conversely, a field study in a real gambling  
94 outlet arguably has high ecological validity but lacks the control of confounding factors and  
95 makes it difficult to obtain physiological measures.

96 By equipping participants with head-mounted VR-glasses and sufficient space to  
97 navigate within the VR-environment, a strong sense of immersion can be created, which in  
98 turn generates more realistic stimulation. In this way VR also offers a potential solution for  
99 the problem of ecologically valid addiction-related stimuli for studies in the field of cue-  
100 reactivity<sup>[7,8]</sup>. For example, Bouchard et al.<sup>[2]</sup> developed a VR-design that is built to provide  
101 ecologically valid stimuli for participants suffering from gambling disorder by placing them

102 in a virtual casino. The design can be used in treatment in order to test reactions and learned  
103 cognitive strategies in a secure environment. The present study builds upon this idea to create  
104 a design that allows assessment of behavioral, subjective and physiological cue-reactivity in  
105 VR-environments. Participants are immersed in two rich and navigable VR environments that  
106 either represent a (neutral) café environment or a gambling-related casino environment.  
107 Within these environments, behavioral cue-reactivity can be measured via behavioral tasks  
108 implemented in VR. Given that immersion in the virtual environment takes place in a  
109 controlled lab setting, the measurement of physiological variables like electrodermal  
110 activity<sup>[39]</sup> and heart rate, as indicators of physiological cue-reactivity<sup>[25,26]</sup>, is also easily  
111 accommodated.

112 Studies using computational modeling to assess latent processes underlying learning  
113 and decision-making increasingly include not only binary decisions, but also response times  
114 (RTs) associated with these decisions, e.g. via sequential sampling models such as the drift  
115 diffusion model (DDM)<sup>[40]</sup>. This approach has several potential advantages. First, leveraging  
116 the information contained in the full RT distributions can improve the stability of parameter  
117 estimates<sup>[41,42]</sup>. Second, by conceiving decision making as a dynamic diffusion process, a  
118 more detailed picture of the underlying latent processes emerges<sup>[43–47]</sup>. Recent studies, for  
119 instance, applied these techniques to temporal discounting, where they revealed novel insights  
120 into effects of pharmacological manipulation of the dopamine system on choice dynamics<sup>[46]</sup>.  
121 Likewise, we applied these techniques to examine the processes underlying reinforcement  
122 learning impairments in gambling disorder<sup>[48]</sup> and decision-making alterations following  
123 medial orbitofrontal cortex lesions<sup>[45]</sup>. Importantly, most standard lab-based testing settings  
124 use keyboards, button boxes and computer screens to record responses and display stimuli  
125 during behavioral tasks. In contrast, in the present study we used VR-controllers in a 3D  
126 virtual space. This represents a fundamentally different response mode, because in VR,  
127 participants have to physically move the controller to the location of the chosen option and  
128 then execute a button press to indicate their choice, adding additional motor complexity. In  
129 particular in the context of RT-based modeling, a crucial question is therefore whether  
130 responses obtained via VR-controllers allow for a comprehensive RT-based computational  
131 modeling, as previously done using standard approaches. Therefore, we also explored the  
132 applicability of drift diffusion modeling in the context of behavioral data obtained in VR.

133 Besides validating our VR-design with a healthy cohort of participants, the study at  
134 hand investigated the stability of parameters derived from temporal discounting tasks, in  
135 particular the discount rate  $\log(k)$ . Recently, the reliability of behavioral tasks as trait

136 indicators of impulsivity and cognitive control has been called into question<sup>[49,50]</sup>, in particular  
137 when compared to questionnaire-based measures of self-control<sup>[49]</sup>. It has been argued that the  
138 inherent property that makes behavioral tasks attractive for group-based comparisons renders  
139 them less reliable as trait markers<sup>[51]</sup>. Specifically, Hedge et al.<sup>[51]</sup> argue that tasks having a  
140 low between participant variability produce robust group effects in experimental studies and  
141 are therefore employed frequently. However, some of these tasks suffer from reduced test-  
142 retest-reliability for individual participants due to their low between-participant variability.  
143 Notably, Enkavi et al.<sup>[49]</sup> reported a reliability of .65 for the discount rate  $k$ , the highest of all  
144 behavioral tasks examined in that study, and comparable to the reliability estimates of the  
145 questionnaire-based measures. This is in line with previous studies on the reliability of  $k$ ,  
146 which provided estimates ranging from .7 to .77<sup>[52,53]</sup>. Importantly, as outlined above, both the  
147 actual response mode and the contextual setting of VR-based experiments differ substantially  
148 from standard lab-based testing situations employed in previous reliability studies of temporal  
149 discounting<sup>[49,52–55]</sup>. Therefore, it is an open question whether temporal discounting measures  
150 obtained in VR exhibit a reliability comparable to the standard lab-based tests that are  
151 typically used in psychology.

152       Taken together, by examining healthy non-gambling participants on different days and  
153 under different conditions (neutral vs. gambling-related VR environment, standard lab-based  
154 testing situation), we addressed the issue of reliability of temporal discounting in virtual vs.  
155 standard lab environments. We furthermore explored the feasibility of applying the drift  
156 diffusion model in the context of RTs obtained via VR-compatible controllers. Finally, we  
157 also examined physiological reactivity during exploration of the different virtual  
158 environments. The specific virtual environments employed here are ultimately aimed to  
159 examine these processes in gambling disorder (e.g. the setup includes a gambling-related and  
160 a neutral cafe environment). However, the present study has more general implications for the  
161 application of behavioral and psychophysiological testing in virtual environments by  
162 examining the reliability of model-based analyses of decision-making in lab-based testing vs.  
163 testing in different VR environments in a group of young non-gambling controls.

164 We hypothesized that the data produced on different days and under different conditions  
165 would yield only little evidence in favor of systematic shifts in temporal discounting behavior  
166 within a group of healthy non-gambling participants, suggesting only insubstantial effects  
167 caused by the different environments in our VR-design. Furthermore, we hypothesized that  
168 temporal discounting would show a strong reliability, adding further strength to the case that

169 temporal discounting is stable over time and can be applied in VR. Finally, we hypothesized  
170 that we could capture latent decision variables in a VR context with the DDM.

## 171 **Methods**

172 *Participants.* Thirty-four healthy participants (25 female) aged between 18 and 44  
173 (mean = 26.41, std = 6.44) were invited to the lab on three different occasions. Participants  
174 were recruited via flyers at the University of Cologne and via postings in local internet  
175 forums. No participant indicated a history of traumatic brain injury, psychiatric or  
176 neurological disorders or severe motion sickness. Participants were additionally screened for  
177 gambling behavior using the questionnaire Kurzfragebogen zum Glückspielverhalten  
178 (KFG)<sup>[56]</sup>. The KFG fulfills the psychometric properties of a reliable and valid screening  
179 instrument. No participant showed a high level (>15 points on the KFG) of gambling affinity  
180 (mean = 1.56, std = 2.61, range: 0 to 13).

181 Participants provided informed written consent prior to their participation, and the  
182 study procedure was approved by the Ethics Board of the Germany Psychological Society.  
183 The procedure was in accordance with the 1964 Helsinki declaration and its later amendments  
184 or comparable ethical standards.

185 *VR-Setup.* The VR-environments were presented using a wireless HTC VIVE head-  
186 mounted display (HMD). The setup provided a 110° field of view, a 90 Hz refresh rate and a  
187 resolution of 1440 x 1600 Pixel per eye. Participants had an area of about 6m<sup>2</sup> open space to  
188 navigate the virtual environment. For the execution of the behavioral tasks and additional  
189 movement control participants held one VR-controller in their dominant hand. The VR-  
190 software was run on a PC with the following specifications: CPU: Intel Core i7-3600,  
191 Memory: 32.0 GB RAM, Windows 10, GPU: NVIDIA GeForce GTX 1080 (Ti). The VR-  
192 environments themselves were designed in Unity. Auditory stimuli were presented using on-  
193 ear headphones.

194 *VR-Environments.* The two VR-environments both consisted of a starting area and an  
195 experimental area. The starting area was the same for both VR-environments. It consisted of a  
196 small rural shopping street and a small park. Participants heard low street noises. The area  
197 was designed for familiarization with the VR-setup and the initial exploration phase. The  
198 experimental area of the environments differed for the two environments. For the VR<sub>neutral</sub>  
199 environment it contained a small café with a buffet (Figure 1 a, b and c). Participants could  
200 hear low conversations and music. The gambling-related environment (VR<sub>gambling</sub>) contained a  
201 small casino with slot machines and a sports betting area (Figure 1 d, e and f). The audio  
202 backdrop was the sound of slot machines and sports. The floorplan of both of these  
203 experimental areas was identical but mirrored for the café (Figure 1 a and d). Both



204 experimental areas additionally included eight animated human avatars. These avatars  
205 performed steady and non-repetitive behaviors like gambling and ordering food for the  
206 gambling-related and neutral environments, respectively. Both experimental areas (café and  
207 casino) had entrances located at the same position within the starting area of the VR-  
208 environments, which were marked by corresponding signs.

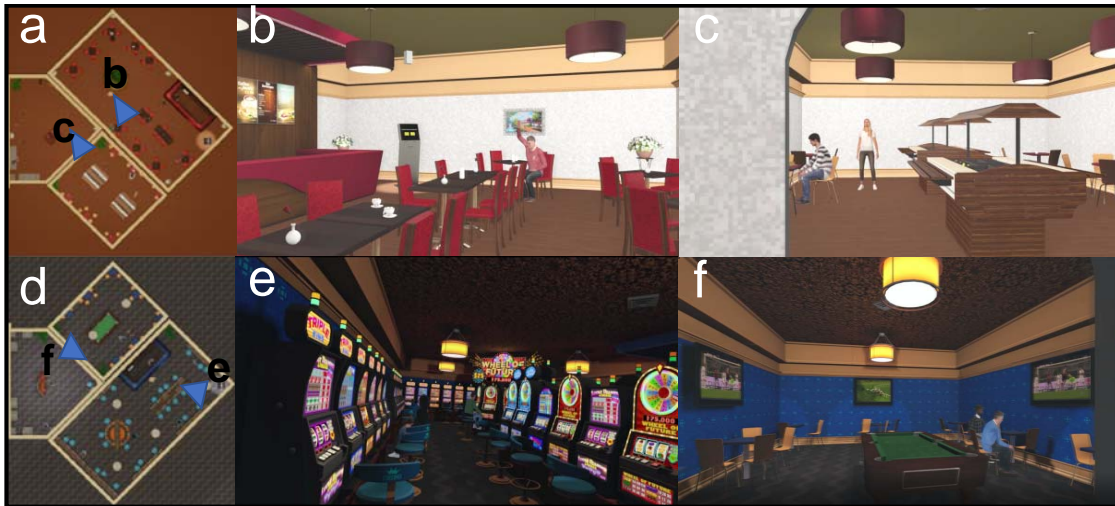

209

210 **Figure 1.** Experimental areas of the VR-environments a) Floorplan of the café within the VR-neutral environment b) View of  
211 the main room of the café c) View of the buffet area of the café d) Floorplan of the casino within the VR-gambling  
212 environment e) View of the main room of the casino f) View of the sports bar within the casino

213 *Experimental procedure.* Participants were invited to the VR lab for three different  
214 sessions on three different days. The time between the sessions was between one day and  
215 nineteen days (mean = 3.85, std = 3.36). During the three sessions participants either explored  
216 one of two different VR environments (VR-sessions) followed by the completion of two  
217 behavioral tasks, or simply performed the same two behavioral tasks in a standard lab-testing  
218 context (Lab-session). If the session was a VR-session, electrodermal activity (EDA)<sup>[39]</sup> was  
219 measured during a non-VR baseline period and the exploration of the VR-environments. The  
220 order of the sessions was pseudorandomized. At the first session, not depending on if VR was  
221 applied or not, participants arrived at the lab and the behavioral tasks were explained in detail.  
222 If the session was a Lab-session, participants proceeded with the two behavioral tasks. If the  
223 session was the first of the VR-sessions, participants were subsequently familiarized with the  
224 VR-equipment and handling. Participants were seated and a five-minute EDA baseline was  
225 measured (baseline phase). For both VR-sessions participants were then helped to apply the  
226 VR-equipment and entered the VR-environments. Within the VR-environments participants  
227 first explored the starting area for 5 minutes (first exploration phase). After these five minutes  
228 participants were asked to enter the experimental area of the environment (either the café or  
229 the casino) (Figure 1). Participants were instructed to explore the interior experimental area

230 for five minutes (second exploration phase). Each of the three phases was later binned into  
231 five one-minute intervals and labeled as B (1 to 5) for the baseline phase, F (1 to 5) for the  
232 first exploration phase and S (1 to 5) for the second exploration phase. During the exploration  
233 the experimenter closely monitored the participants and alerted them if they were about to  
234 leave the designated physical VR-space. After the second exploration phase participants were  
235 asked to proceed to a terminal within the VR-environment on which the behavioral tasks were  
236 presented.

237 *Physiological measurements.* EDA was measured using a BioNomadix-PPGED  
238 wireless remote sensor together with a Biopac MP160 data acquisition system (Biopac  
239 Systems, Santa Barbara, CA, USA). A GSR100C amplifier module with a gain of 5V, low  
240 pass filter of 10 Hz and a high pass filter DC were included in the recording system. The  
241 system was connected to the acquisition computer running the AcqKnowledge software.  
242 Triggers for the events within the VR-environments were sent to the acquisition PC via  
243 digital channels from the VR-PC. Disposable Ag/AgCl electrodes were attached to the thenar  
244 and hypothenar eminences of the non-dominant palm. Isotonic paste (Biopac Gel 101) was  
245 used to ensure optimal signal transmission. The signal was measured in micro-Siemens units  
246 (mS).

247 *Behavioral Tasks.* Participants performed the same two behavioral tasks with slightly  
248 varied rewards and choices in each of the three sessions: a temporal discounting task<sup>[17]</sup> and a  
249 2-step sequential decision-making task<sup>[57,58]</sup>. Results from the 2-step task will be reported  
250 separately. In the temporal discounting task participants had to repeatedly choose between an  
251 immediately available (smaller-but-sooner, SS) monetary reward of 20 Euros and larger-but-  
252 later (LL) temporally delayed monetary rewards. The LL options were multiples of the SS  
253 option (range 1.025 to 3.85) combined with different temporal delays (range 1 to 122 days).  
254 We constructed three sets of six delays and 16 LL options. Each set had the same mean delay  
255 and the same mean LL option. Combining each delay with every LL option within each set  
256 resulted in three sets of 96 trials. The order of presentation of the trial sets was counter  
257 balanced across participants and sessions. All temporal discounting decisions were  
258 hypothetical<sup>[59,60]</sup>. In the VR-version of the task two yellow squares were presented to the  
259 participants (Figure 2). One depicted the smaller offer of 20 Euros now, while the other  
260 depicted the delayed larger offer. For the lab-based testing session were presented in the same  
261 way except that the color scheme was white writing on a black background. Offers were  
262 randomly assigned to the left/right side of the display and presented until a decision was  
263 made. The next trial started .5 to 1 seconds after the decision. Participants indicated their

264 choice either by aiming the VR-controller at the preferred option and pulling the trigger (VR-  
265 sessions) or by pressing the corresponding arrow key on the keyboard (Lab-session).

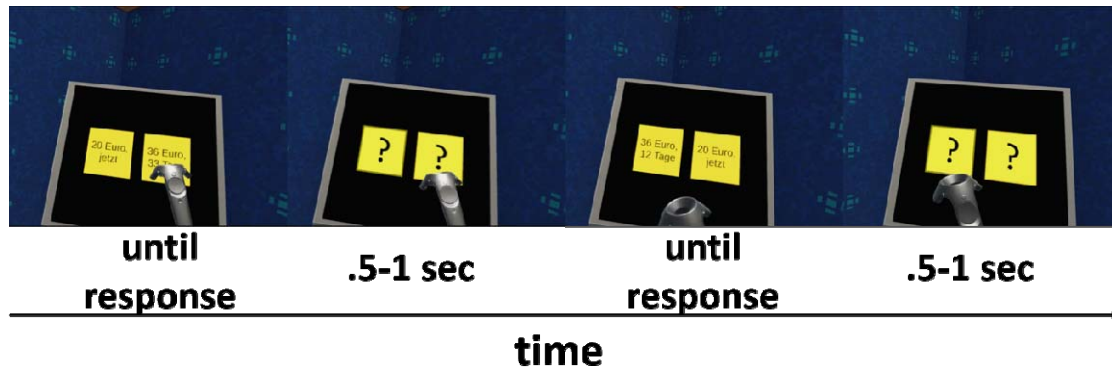

266

267 **Figure 2.** Presentation of the temporal discounting task in VR. Participants had to repeatedly decide between a small but  
268 immediate reward (SS) and larger but temporally delayed rewards (LL). Amounts and delays were presented in yellow  
269 squares. During the inter-trial intervals (.5-1 sec.) these squares contained only question marks. Participants indicated their  
270 choice by pointing the VR-controller at one of the yellow squares and pulling the trigger.

271

272 *Model-free discounting data analysis.* The behavioral data from the temporal  
273 discounting task was analyzed using several complementary approaches. First, we used a  
274 model-free approach that involved no a priori hypotheses about the mathematical shape of the  
275 discounting function. For each delay, we estimated the LL reward magnitudes at which the  
276 subjective value of the LL reward was equal to the SS (indifference point). This was done by  
277 fitting logistic functions to the choices of the participants, separately for each delay.  
278 Subsequently, these indifference points were plotted against the corresponding delays, and the  
279 area under the resulting curve (AUC) was calculated using standard procedures<sup>[61]</sup>. AUC  
280 values were derived for each participant and testing session, and further analyzed with the  
281 intra-class correlation (ICC) and the Friedman Test, a non-parametric equivalent of the  
282 repeated measures ANOVA model.

283

284 *Computational modeling.* Previous research on the effects of the delay of a reward on  
285 its valuation proposed a hyperbolic nature of devaluation<sup>[62,63]</sup>. Therefore, the rate of  
286 discounting for each participant was also determined employing a cognitive modeling  
287 approach using hierarchical Bayesian modeling<sup>[16]</sup>. A hierarchical model was fit to the data of  
288 all participants, separately for each session (see below). We applied a hyperbolic discounting  
289 model (equation 1):

289

290 Here,  $SV(LL)$  denotes the subjective (discounted) value of the LL.  $A$  and  $D$  represent  
291 the amount and the delay of the LL, respectively. The parameter  $k$  governs the steepness of  
292 the value decay over time, with higher values of  $k$  indicating steeper discounting of value over  
293 time. As the distribution of the discount rate  $k$  is highly skewed, we estimated the parameter  
294 in log-space ( $\log[k]$ ), which avoids numerical instability in estimates close to 0.

295 The hyperbolic model was then combined with two different choice rules, a softmax  
296 action selection rule<sup>[64]</sup> and the drift diffusion model<sup>[44]</sup>. For softmax action selection, the  
297 probability of choosing the LL option on trial  $t$  is given by equation (2).

$$298 \quad P(LL_t) = \frac{\exp(SV_{LL_t} * \beta)}{\exp(SV_{SS_t} * \beta) + \exp(SV_{LL_t} * \beta)} \quad (2)$$

299 Here, the  $\beta$ -parameter determines the stochasticity of choices with respect to a given  
300 valuation model. A  $\beta$  of 0 would indicate that choices are random, whereas higher  $\beta$  values  
301 indicate a higher dependency of choices on option values. The resulting best fitting parameter  
302 estimates were used to test the ICC and systematic session effects via comparison of the  
303 posterior probabilities of group parameters.

304 Next, we incorporated response times (RTs) into the model by replacing the softmax  
305 choice rule with the drift diffusion model (DDM)<sup>[43-46]</sup>. The DDM models choices between  
306 two options as a noisy evidence accumulation that terminates as soon as the accumulated  
307 evidence exceeds one of two boundaries. In this analysis the upper boundary was set to  
308 represent LL choices, and the lower boundary SS choices. RTs for choices of the immediate  
309 reward were multiplied by -1 prior to model estimation. To prevent outliers in the RT data  
310 from negatively impacting model fit, the 2,5% slowest and fastest trials of each participant  
311 were excluded from the analysis<sup>[44,45]</sup>. In the DDM the RT on trial  $t$  is distributed according to  
312 Wiener first passage time (wfpt) (equation 3).

$$RT_t \sim \text{wfpt}(\alpha, \tau, z, v) \quad (3)$$

313 Here  $\alpha$  represents the boundary separation modeling the tradeoff between speed and  
314 accuracy.  $\tau$  represents the non-decision time, reflecting perception and response preparation  
315 times. The starting value of the diffusion process is given by  $z$ , which therefore models a  
316 potential bias towards one of the boundaries. Finally, rate of evidence accumulation is given  
317 by the drift-rate  $v$ .

318 We first fit a null model (DDM<sub>0</sub>), where the value difference between the two options  
319 was not included, such that DDM parameters were constant across trials<sup>[45,46]</sup>. We then used

320 two different temporal discounting DDMs, in which the value difference between options  
321 modulated trial-wise drift rates. This was done using either a linear (DDM<sub>L</sub>) or a non-linear  
322 sigmoid (DDM<sub>S</sub>) linking function<sup>[47]</sup>. In the DDM<sub>L</sub>, the drift-rate  $v$  in each trial is linearly  
323 dependent on the trial-wise scaled value difference between the LL and the SS options  
324 (equation 4)<sup>[44]</sup>. The parameter  $v_{\text{coeff}}$  maps the value differences onto  $v$  and scales them to the  
325 DDM:

$$326 \quad v_t = v_{\text{coeff}} * (SV(LL_t) - SV(SS_t)) \quad (4)$$

327

328 One drawback of a linear representation of the relationship between the drift-rate  $v$   
329 and trial-wise value differences is that  $v$  might increase infinitely with high value differences,  
330 which can lead the model to under-predict RTs for high value differences<sup>[45]</sup>. In line with  
331 previous work<sup>[45,46]</sup> we thus included a third version of the DDM, that assumes a non-linear  
332 sigmoidal mapping from trial-wise value differences to drift rates (equations 5 and 6)<sup>[43]</sup>:

$$v_t = S(v_{\text{coeff}} * (SV(LL_t) - SV(SS_t))) \quad (5)$$

$$S(m) = \frac{2 * v_{\text{max}}}{1 + \exp(-m)} - v_{\text{max}} \quad (6)$$

333

334 Here, the linear mapping function from the DDM<sub>L</sub> is additionally passed through a sigmoid  
335 function  $S$  with the asymptote  $v_{\text{max}}$ , causing the relationship between  $v$  and the scaled trail-  
336 wise value difference  $m$  to asymptote at  $v_{\text{max}}$ .

337 We have previously reported detailed parameter recovery analyses for the DDM<sub>S</sub> in  
338 the context of value-based decision-making tasks such as temporal discounting<sup>[45]</sup>, which  
339 revealed that both subject-level and group-level parameters recovered well.

340

341 *Hierarchical Bayesian Models.* All models were fit to the data of all participants in a  
342 hierarchical Bayesian estimation scheme, separately for each session, resulting in independent  
343 estimates for each participant per session. Participant-level parameters were assumed to be  
344 drawn from group-level Gaussian distributions, the means and precisions of which were again  
345 estimated from the data. Posterior distributions were estimated via Markov Chain Monte  
346 Carlo in the R programming language<sup>[65]</sup> using the JAGS software package<sup>[66]</sup>. For the  
347 DDM's the Wiener module for JAGS was used<sup>[67]</sup>. For the group-level means, uniform priors  
348 over numerically plausible parameter ranges were chosen (Table 1). Priors for the precision of  
349 the group-level distribution were Gamma distributed (0.001, 0.001). The convergence of

350 chains was determined by the R-hat statistic<sup>[68]</sup>. Values between 1 and 1.01 were considered  
351 acceptable. Comparisons of relative model fit were performed using the Deviance Information  
352 Criterion (DIC), where lower values reflect a superior model fit<sup>[69]</sup>.

353 **Table 1.** Ranges for the uniform priors  
354 of group-level parameter means.  
355 Ranges were chosen to cover  
356 numerically plausible values.  
357 Parameters included in multiple  
358 models are only listed once.

| Parameter               | Prior for group mean       |
|-------------------------|----------------------------|
| $\log(\mathbf{k})$      | <i>Uniform</i> (-20, 3)    |
| $\text{softmax } \beta$ | <i>Uniform</i> (0, 10)     |
| $\nu$                   | <i>Uniform</i> (-100, 100) |
| $\tau$                  | <i>Uniform</i> (.1, 6)     |
| $\alpha$                | <i>Uniform</i> (.01, 5)    |
| $\mathbf{z}$            | <i>Uniform</i> (.1, .9)    |
| $\nu_{\text{coeff}}$    | <i>Uniform</i> (-100, 100) |
| $\nu_{\text{max}}$      | <i>Uniform</i> (0, 100)    |

359

360 *Systematic session effects on model parameters.* Potential systematic session effects on  
361 group level posterior distributions of parameters of interest were analyzed by overlaying the  
362 posterior distributions of each group level parameter for the different sessions. Here we report  
363 the mean of the posteriors of the estimated group level parameters and the difference  
364 distributions between them, the 95% highest density intervals (HDI) for both of these as well  
365 as directional Bayes Factors (dBF) which quantify the degree of evidence for reductions vs.  
366 increases in a parameter. Because the priors for the group effects are symmetric, this dBF can  
367 simply be defined as the ratio of the posterior mass of the difference distributions above zero  
368 to the posterior mass below zero<sup>[70]</sup>. Here directional Bayes Factors above 3 are interpreted as  
369 moderate evidence in favor of a positive effect, while Bayes Factors above 12 are interpreted  
370 as strong evidence for a positive effect<sup>[71]</sup>. Specifically, a dBF of 3 would imply that a positive  
371 directional effect is three times more likely than a negative directional effect. Bayes Factors  
372 below 0.33 are likewise interpreted as moderate evidence in favor of the alternative model  
373 with reverse directionality. A dBF above 100 is considered extreme evidence<sup>[71]</sup>. The cutoffs  
374 used here are liberal in this context, because they are usually used if the test is against a  $H_0$   
375 implying an effect of 0. In addition, we report the effect size (Cohen's  $d$ ) based on the mean

376 posterior distributions of the session means, the pooled standard deviations across sessions  
377 and the correlation between sessions.

378 *ICC analysis.* The test-retest reliability of the best fitting parameter values between the  
379 three sessions was analyzed using the intra-class correlation coefficient (ICC). The ICC-  
380 analysis was done in the R programming language<sup>[65]</sup> and was based on a mean-rating of three  
381 raters, absolute agreement and a two-way mixed model. ICC values below .5 are an indication  
382 of poor test-retest reliability, whereas values in the range between .5 and .75 indicate a  
383 moderate test-retest reliability<sup>[72]</sup>. Higher values between .75 and .9 indicate a good reliability,  
384 while values above .9 suggest an excellent test-retest reliability.

385 *Analysis of physiological data.* A frequently used index of sympathetic activity is  
386 electrodermal activity, i.e. changes in skin conductance (SC)<sup>[73]</sup>. Here the physiological  
387 reactivity to the VR-environments is measured as the slowly-varying skin conductance level  
388 (SCL)<sup>[39]</sup>. Thus, the SCL was extracted from the EDA signal using continuous decomposition  
389 analysis (CDA) via the Ledalab toolbox<sup>[74]</sup> for Matlab (MathWorks). For the deconvolution,  
390 default settings were used. The resulting signal was then transformed into percentage change  
391 from the mean signal of the five minutes baseline phase at the beginning of the experiment.  
392 Subsequently, five one-minute bins were constructed for each phase of the VR-session  
393 (baseline phase, the first exploration phase and the second exploration phase). An alternative  
394 way of classifying tonic sympathetic arousal can be the number of spontaneous phasic  
395 responses (SCR) in the EDA signal<sup>[74]</sup>. Again, the signal was divided in one-minute bins and  
396 the number of spontaneous SCRs during each bin was calculated from the phasic component  
397 of the deconvoluted EDA signal using the Ledalab toolbox. The resulting values were  
398 similarly transformed into percentage change from the mean number of SCRs during the five  
399 baseline bins. To test whether entering the VR-environments had a general effect on  
400 sympathetic arousal, we compared the values for the last time point of the base line phase  
401 (B5) with the first time point of the first exploration phase (F1) for both sessions using a non-  
402 parametric Wilcoxon Signed-Rank Test. To test whether there was a differential effect of  
403 entering the different experimental areas of the VR-environments on sympathetic arousal, for  
404 both measures the differences between the last time point of the first exploration phase (F5)  
405 and the first time point of the second exploration phase (S1) were compared across VR-  
406 sessions using a non-parametric Wilcoxon Signed-Tanks Test<sup>[75]</sup>. Effect sizes are given as  
407  $r$ <sup>[76]</sup>, computed as the statistic Z divided by the square-root of N. Effect sizes between 0 and .3  
408 are considered small and effect sizes between .3 and .5 are considered medium and  $r$  values >  
409 .5 are considered large effects.

410 *Data and code availability.* Raw behavioral and physiological data as well as JAGS  
 411 model code is available on the Open Science Framework (<https://osf.io/xkp7c/files/>).

## 412 **Results**

413 *Temporal discounting AUC.* The analysis of the AUC values revealed no significant  
 414 session effect across participants (Friedman Test: Chi-Squared = 1.235 df =2 p =.539).  
 415 Furthermore, the ICC value was .93 (95% confidence interval (CI): .89 - .96) (p<.001)  
 416 indicating an excellent test-retest reliability of temporal discounting AUC values over the  
 417 three sessions (Table 2). Pairwise correlations between all sessions can be found in the  
 418 supplementary materials (Supplementary Figure S1).

419 *Softmax choice rule.* For the hyperbolic model with softmax choice rule, the group  
 420 level posteriors showed little evidence for systematic effects of the different sessions on  
 421 log(k) (all BFs < 3 or >.33) (Figure 3a and c and Table 2). In contrast, the softmax  $\beta$   
 422 parameter was higher (reflecting higher consistency) in the VR<sub>neutral</sub> session compared to the  
 423 other sessions (vs. Lab: dBF = .01 and vs. VR<sub>gambling</sub>: dBF = .048) (Figure 3b and d, Table 2).  
 424 This indicates that a higher  $\beta$  in the VR<sub>neutral</sub> session was approximately 100 (Lab) or 20  
 425 (VR<sub>gambling</sub>) times more likely than a lower  $\beta$ . There was little evidence for a systematic effect  
 426 between the Lab and VR<sub>gambling</sub> sessions (dBF = .446).

427 **Table 2.** 95% HDIs for the two parameters of the hyperbolic discounting model. HDIs are described by the min. value first  
 428 and the max value second. Directional Bayes Factors (dBF) are calculated as  $BF = i/(1-i)$ , with  $i$  being the probability mass of  
 429 the difference distributions above zero. Effect sizes are given as Cohen's  $d$ .

| Session                                                | Log(k) |        |        | dBF   | d   | $\beta$ |       |       | dBF  | d   |
|--------------------------------------------------------|--------|--------|--------|-------|-----|---------|-------|-------|------|-----|
|                                                        | Mean   | HDI    |        |       |     | Mean    | HDI   |       |      |     |
| <b>Lab</b>                                             | -4.083 | -4.643 | -3.530 | -     | -   | .417    | .355  | .489  | -    | -   |
| <b>VR<sub>neutral</sub></b>                            | -4.348 | -4.912 | -3.797 | -     | -   | .577    | .461  | .714  | -    | -   |
| <b>VR<sub>gambling</sub></b>                           | -4.274 | -4.882 | -3.687 | -     | -   | .448    | .363  | .547  | -    | -   |
| <b>Lab-<br/>VR<sub>neutral</sub></b>                   | .266   | -.520  | 1.054  | 2.712 | .38 | -.16    | -.31  | -.024 | .01  | .9  |
| <b>Lab-<br/>VR<sub>gambling</sub></b>                  | .191   | -.620  | 1.01   | 2.162 | .3  | -.03    | -.148 | .081  | .446 | .18 |
| <b>VR<sub>gambling</sub>-<br/>VR<sub>neutral</sub></b> | .074   | -.746  | .885   | 1.264 | .1  | -.129   | -.29  | .023  | .048 | .56 |

430



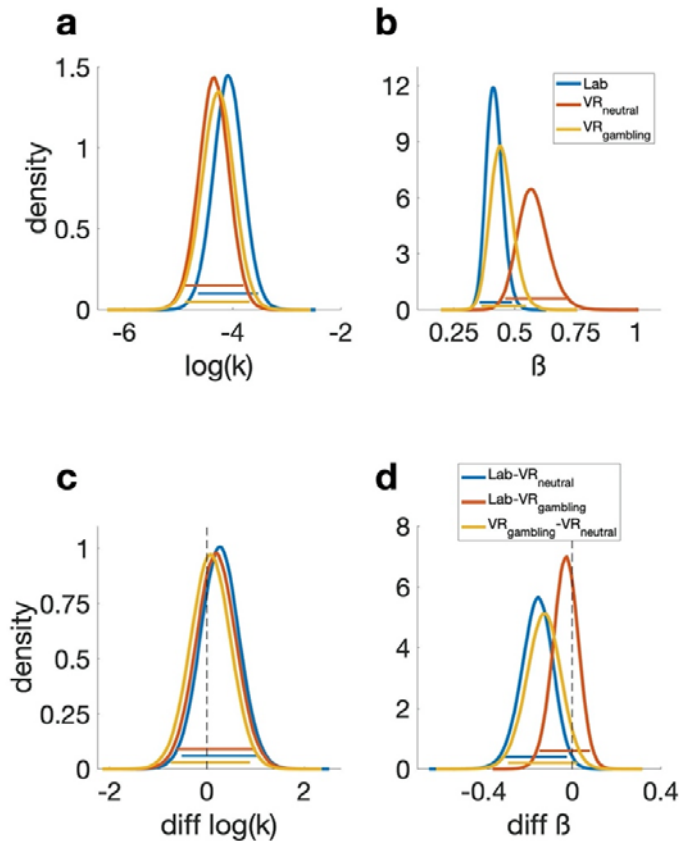

431

432 **Figure 3.** Posterior distributions of the parameters of the hyperbolic discounting model. Colored bars represent the  
 433 corresponding 95% HDIs. a) Posterior distribution of the  $\log(k)$  parameter (reflecting the degree of temporal discounting) for  
 434 all three sessions. b) Posterior distribution of the  $\beta$  or inverse temperature parameter (reflecting decision noise). c) Pairwise  
 435 difference distributions between the posteriors of the  $\log(k)$  parameters of all three sessions. d) Pairwise difference  
 436 distributions between the posteriors of the  $\beta$  parameters of all three sessions.

437 The ICC value for the  $\log(k)$  parameter indicated an excellent test-retest reliability of  
 438 .91 (CI: .86 - .96) ( $p < .001$ ) (Table 3). For the  $\beta$ -parameter of the softmax choice rule the ICC  
 439 value was .34 (CI: .17 - .53) ( $p < .001$ ) indicating a poor test-retest reliability (Table 3). The  
 440 pairwise correlations of estimated parameter values between all sessions can be found in the  
 441 Supplement (Supplementary Figure S2 and S3). Pairwise correlations between all sessions for  
 442 both parameters can be found in the supplementary materials (Supplementary Figure S2 and  
 443 S3).

444 **Table 3.** Summary of the results of the ICC analysis for the AUC values as well as the two parameters of the hyperbolic  
 445 discounting model with a softmax choice rule. Lower and upper bound describe the 95% confidence interval.

| Parameter | ICC | p     | Lower bound | Upper Bound |
|-----------|-----|-------|-------------|-------------|
| AUC       | .93 | <.001 | .89         | .96         |
| $\log(k)$ | .91 | <.001 | .86         | .95         |
| $\beta$   | .34 | <.001 | .17         | .53         |

446

447

| Model            | Lab    | VR <sub>neutral</sub> | VR <sub>gambling</sub> | Rank |
|------------------|--------|-----------------------|------------------------|------|
| DDM <sub>0</sub> | 9275.7 | 9569.8                | 9225.7                 | 3    |
| DDM <sub>L</sub> | 7558.9 | 7921.4                | 7663.0                 | 2    |
| DDM <sub>S</sub> | 6992.3 | 7327.2                | 7033.1                 | 1    |

448 **Table 4.** Summary of the DICs of all DDM models in all sessions. Ranks are based on the lowest DIC in all sessions.

449

450 *Drift diffusion model choice rule.* Model comparison revealed that the DDM<sub>S</sub> had the  
451 lowest DIC in all conditions (Table 4) replicating previous work <sup>[45,46,48]</sup>. Consequently,  
452 further analyses of session effects and reliability focused on this model. For the log(k)  
453 parameter, the 95% HDIs showed a high overlap between all sessions indicating no  
454 systematic session effects, however the BFs showed moderate evidence for a reduced log(k)  
455 in the VR<sub>neutral</sub>-session (Figure 4 a and d, Table 5). A lower value in the VR<sub>neutral</sub>-session was  
456 about seven (Lab-session dBF = 6.756) or four times (VR<sub>gambling</sub> dBF = 3.86) more likely than  
457 a lower value. Similarly, the posterior distributions of  $v_{\max}$ ,  $v_{\text{coeff}}$  and  $\alpha$  were highly  
458 overlapping, whereas some of the dBFs gave moderate evidence for systematic directional  
459 effects within these parameters (Figure 4 b, c, e and f, Figure 5 b and e, Table 5).  $v_{\text{coeff}}$ ,  
460 mapping trial-wise value difference onto the drift rate, was lowest in the Lab-session and  
461 highest in VR<sub>neutral</sub> (Lab-VR<sub>neutral</sub> dBF = .074, Lab-VR<sub>gambling</sub> = .2, VR<sub>gambling</sub>-VR<sub>neutral</sub> = .228).  
462 Thus, an increase in  $v_{\text{coeff}}$  in VR<sub>neutral</sub> compared to the Lab-session was approximately thirteen  
463 times more likely than a decrease. Likewise, it was approximately five times more likely that  
464 there was an increase in the VR<sub>neutral</sub> compared to the VR<sub>gambling</sub>-session. For  $v_{\max}$ , the upper  
465 boundary for the value difference's influence on the drift rate, the dBFs indicated that a  
466 positive shift from VR<sub>gambling</sub> to VR<sub>neutral</sub> was five times more likely than a negative shift (dBF  
467 = .203) but there was only very little indication of a systematic difference between both of  
468 them and the Lab-session. Finally, a reduction of the boundary separation parameter  $\alpha$  was  
469 five times more likely than an increase when comparing the VR<sub>neutral</sub> to the Lab-session (dBF  
470 = .255). There was little evidence for any other systematic differences. The bias parameter  $z$   
471 displayed high overlap in HDIs and little evidence for any systematic effects between sessions  
472 (all dBFs >.33 or <3) (Figure 5 c and f, Table 5). For the non-decision time parameter  $\tau$  there  
473 was extreme evidence for an increase in the VR-sessions compared to the Lab-session (both  
474 dBFs >100), reflecting prolonged motor and/or perceptual components of the RT that was  
475 more than 100 times more likely than a shortening of these components (Figure 5 a and d,  
476 Table 5).

477

478 **Table 5.** Directional Bayes Factors (dBF) and effect sizes (Cohen's d) for all between session comparisons for all parameters  
 479 of the DDM<sub>s</sub>. Means and HDIs of the posteriors and difference distributions are summarized in the supplementary materials  
 480 (Supplementary Table S1). BFs are calculated as  $BF = i/(1-i)$ , with  $i$  being the probability mass of the difference distributions  
 481 above zero.

| Contrast                                          | log(k) |     | $v_{\text{coeff}}$ |     | $v_{\text{max}}$ |     | $\tau$ |     | $\alpha$ |      | $z$   |     |
|---------------------------------------------------|--------|-----|--------------------|-----|------------------|-----|--------|-----|----------|------|-------|-----|
|                                                   | dBF    | d   | dBF                | d   | dBF              | d   | dBF    | d   | dBF      | d    | dBF   | d   |
| Lab-<br>VR <sub>neutral</sub>                     | 6.756  | .37 | .074               | .37 | .377             | .2  | >100   | 1.2 | .255     | .224 | .530  | .2  |
| Lab-<br>VR <sub>gambling</sub>                    | 1.679  | .19 | .200               | .59 | 1.573            | .09 | >100   | 1.5 | .358     | .160 | 1.118 | .04 |
| VR <sub>gambling</sub> -<br>VR <sub>neutral</sub> | 3.860  | .29 | .228               | .27 | .203             | .34 | 3.413  | .17 | .629     | .070 | .458  | .2  |

482

483 The ICC value for the log(k) parameter was .7 (CI: .56 - .8) indicating a moderate test-  
 484 retest-reliability (Table 5). For the other DDM<sub>s</sub> parameters, ICC values were substantially  
 485 lower (Table 6). Pairwise correlations between all sessions for all parameters can be found in  
 486 the supplementary materials (Supplementary Figure S4-S9).

487 *Split-half reliability control analyses for DDM parameters.* In light of the lower ICC  
 488 values for the DDM<sub>s</sub> parameters beyond  $\log(k)$ , we ran additional analyses. Specifically, we  
 489 hypothesized that these lower ICC values might be attributable to fluctuations of state factors,  
 490 e.g. mood, fatigue or motivation, between the different sessions. Therefore, we explored  
 491 within-session reliability of these parameters, separately for each session. Trials were split  
 492 into odd and even trials and modelled separately using the DDM<sub>s</sub>, as described above. In  
 493 general, within-session split-half reliability was substantially greater than test-retest  
 494 reliability, and mostly in a good to excellent range (range: -.1 for  $v_{\text{coeff}}$  in VR<sub>gambling</sub> to .94 for  
 495  $\tau$  in VR<sub>neutral</sub>). The lower test-retest reliabilities of some of the DDM<sub>s</sub> parameters are therefore  
 496 unlikely to be due to the specifics of the parameter estimation procedure. Rather, these  
 497 findings are compatible with the view that the parameters underlying the evidence  
 498 accumulation process might be more sensitive to state-dependent changes in mood, fatigue or  
 499 motivation. Full results for the split-half reliability analyses can be found in the  
 500 supplementary materials (Supplementary Tables S3-S5).

501

502

503

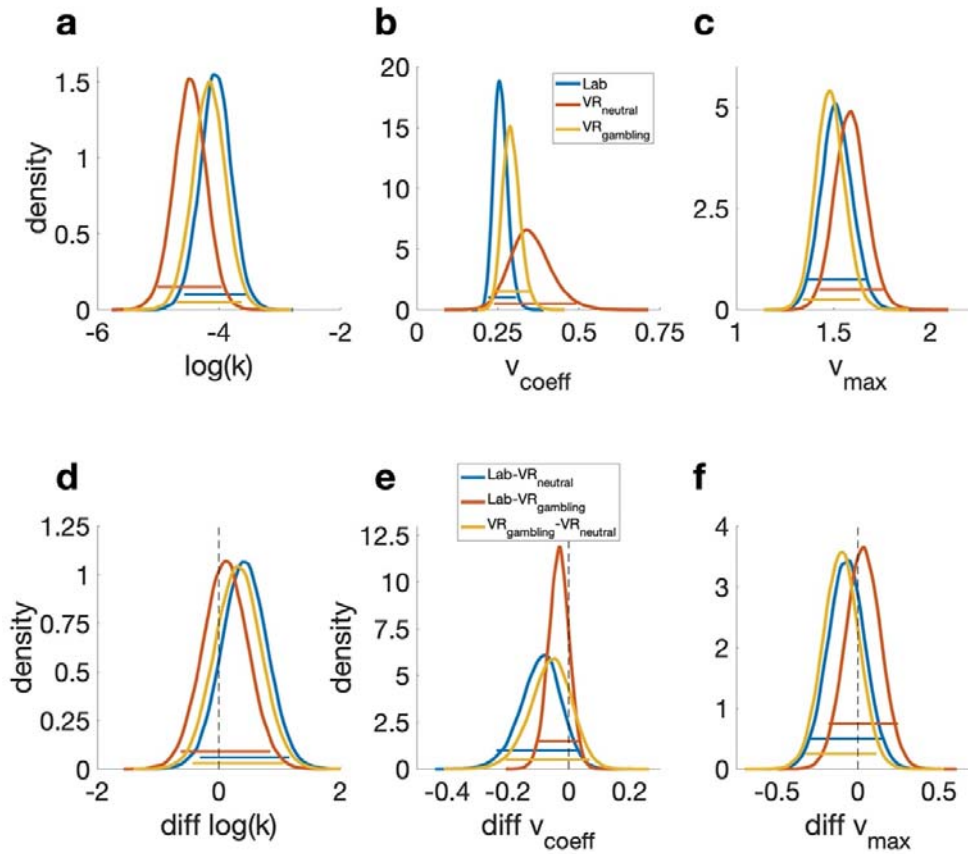

504

505 **Figure 4.** Posterior distributions of the parameters of the DDM<sub>S</sub> model. Colored bars represent the corresponding 95% HDIs.  
506 a) Posterior distributions of the  $\log(k)$  parameter for all three sessions. b) Posterior distributions of the  $v_{\text{coeff}}$  parameter  
507 (mapping the drift rate onto the trial wise value difference and the drift rate). c) Posterior distributions of the  $v_{\text{max}}$  parameter (setting an  
508 asymptote for the relation between the trial wise value difference and the drift rate). d) Pairwise difference distributions  
509 between the posterior distributions of the  $\log(k)$  parameters of the three sessions. e) Pairwise difference distributions  
510 between the posterior distributions of the  $v_{\text{coeff}}$  parameters of the three sessions. f) Pairwise difference distributions between the  
511 posterior distributions of the  $v_{\text{max}}$  parameters of the three sessions.

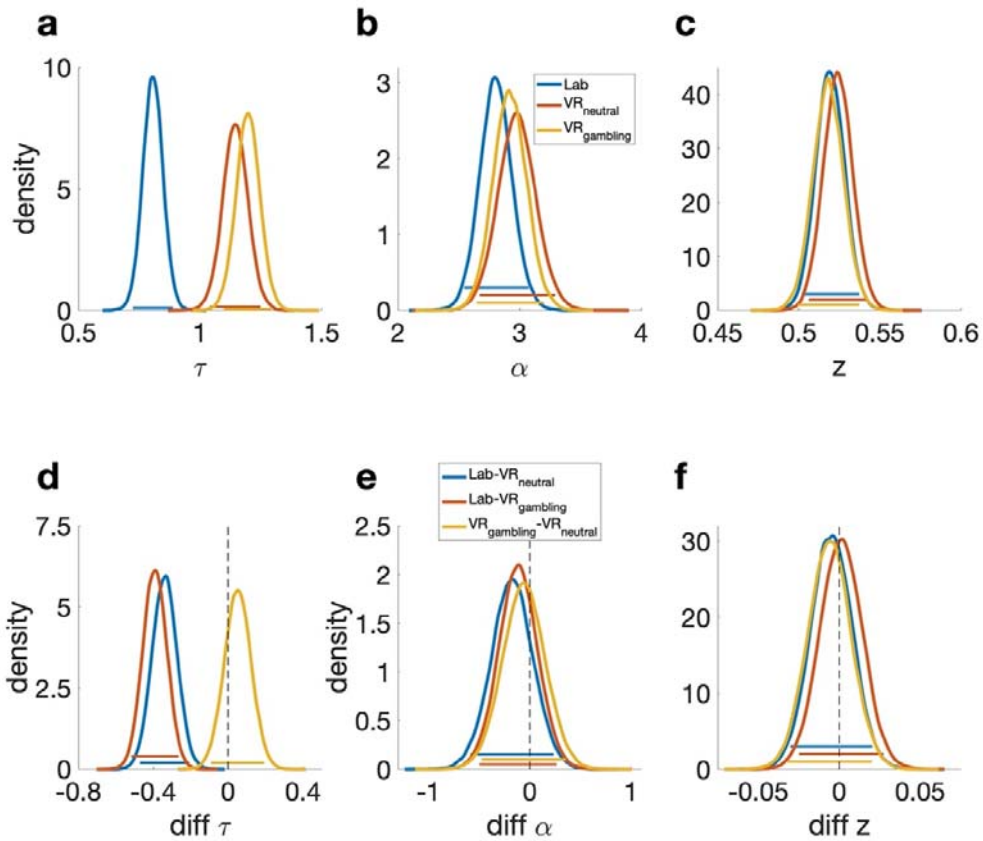

512

513 **Figure 5.** Posterior distributions of the remaining parameters of the DDM<sub>S</sub> model. Colored bars represent the corresponding  
 514 95% HDIs. a) Posterior distributions of the  $\tau$  parameter (non-decision time) for all three sessions. b) Posterior distributions of  
 515 the  $\alpha$  parameter (separation between decision boundaries). c) Posterior distributions of the  $z$  parameter (bias towards one  
 516 decision option). d) Pairwise difference distributions between the posterior distributions of the  $\tau$  parameters of the three  
 517 sessions. e) Pairwise difference distributions between the posterior distributions of the  $\alpha$  parameters of the three sessions. f)  
 518 Pairwise difference distributions between the posterior distributions of the  $z$  parameters of the three sessions.

519

**Table 6.** Summary of the results of the ICC analysis of the DDM<sub>S</sub> parameters.

| Parameter                            | ICC | p     | Lower bound | Upper Bound |
|--------------------------------------|-----|-------|-------------|-------------|
| <b>log(k)</b>                        | .7  | <.001 | .56         | .8          |
| <b><math>v_{\text{coeff}}</math></b> | .11 | .14   | -.053       | .3          |
| <b><math>v_{\text{max}}</math></b>   | .33 | <.001 | .16         | .52         |
| <b><math>\tau</math></b>             | .19 | .033  | .019        | .38         |
| <b><math>\alpha</math></b>           | .42 | <.001 | .24         | .59         |
| <b><math>z</math></b>                | .4  | <.001 | .22         | .58         |

520

521

522

523

524 *Electrodermal activity (EDA)*. The data of 8 of the 34 participants had to be excluded  
525 from the EDA analysis, due to technical problems or missing data during one of the testing  
526 sessions. Physiological reactivity in the remaining 26 (18 female) participants was analyzed  
527 by converting the SCL signal as well as the nSCRs into percent change from the mean level  
528 during the base line phase. Both signals were then binned into five one-minute intervals for  
529 each of the three phases (baseline, first exploration and second exploration phase). All  
530 comparisons were tested with the Wilcoxon Signed Rank Test. Entering the VR-environments  
531 (comparing bin B5 to bin F1 for both environments individually) resulted in a significant  
532 increase in the SCL values for both VR-environments (VR<sub>neutral</sub>:  $Z = -3.67$ ,  $p < .001$ ,  $r = .72$ ;  
533 VR<sub>gambling</sub>:  $Z = -3.543$ ,  $p = .002$ ,  $r = .695$ ) (Figure 6 c and d). The effect was large in both  
534 sessions ( $r > .5$ ). However, for the number of spontaneous SCR (nSCRs), this effect was only  
535 significant in the neutral VR-environment (neutral:  $Z = -2.623$ ,  $p = .009$ ,  $r = .515$ ; gambling:  
536  $Z = -.013$ ,  $p = .99$ ,  $r = .002$ ). There was no significant difference between the two sessions, but  
537 the effect was of medium size ( $Z = -1.7652$ ,  $p = .078$ ,  $r = .346$ ) (Figure 6 a and b). To test  
538 whether entering the specific experimental areas of the two VR-environments (virtual café vs.  
539 virtual casino) had differential effects on physiological responses, the increase in sympathetic  
540 arousal from the end of the first exploration phase to the start of the second exploration phase  
541 was examined (comparing bin F5 to bin S1, see Figure 6 b and d). The SCL (neutral:  $Z = -$   
542  $0.7238$ ,  $p = .469$ ,  $r = .142$ ; gambling:  $Z = -.089$ ,  $p = .929$ ,  $r = .017$ ) as well as the nSCRs  
543 (neutral:  $Z = -1.943$ ,  $p = .052$ ,  $r = .381$ ; gambling:  $Z = .982$ ,  $p = .326$ ,  $r = .193$ ) assessed for  
544 each session individually showed no significant effect. The effect size was medium ( $r = .381$ )  
545 for the nSCRs of the VR<sub>neutral</sub>-session and small for all other comparisons ( $r < .3$ ).  
546 Furthermore, the Wilcoxon Signed-Ranks test indicated no significant differences between  
547 the two experimental areas on both sympathetic arousal measures (SCL:  $Z = -.572$ ,  $p = .381$ ,  $r$   
548  $= .11$ ; nSCRs.:  $Z = -1.7652$ ,  $p = .078$ ,  $r = .346$ ) (Figure 6 b and d). For the nSCRs however,  
549 the effect was of a medium size ( $r = .346$ ).

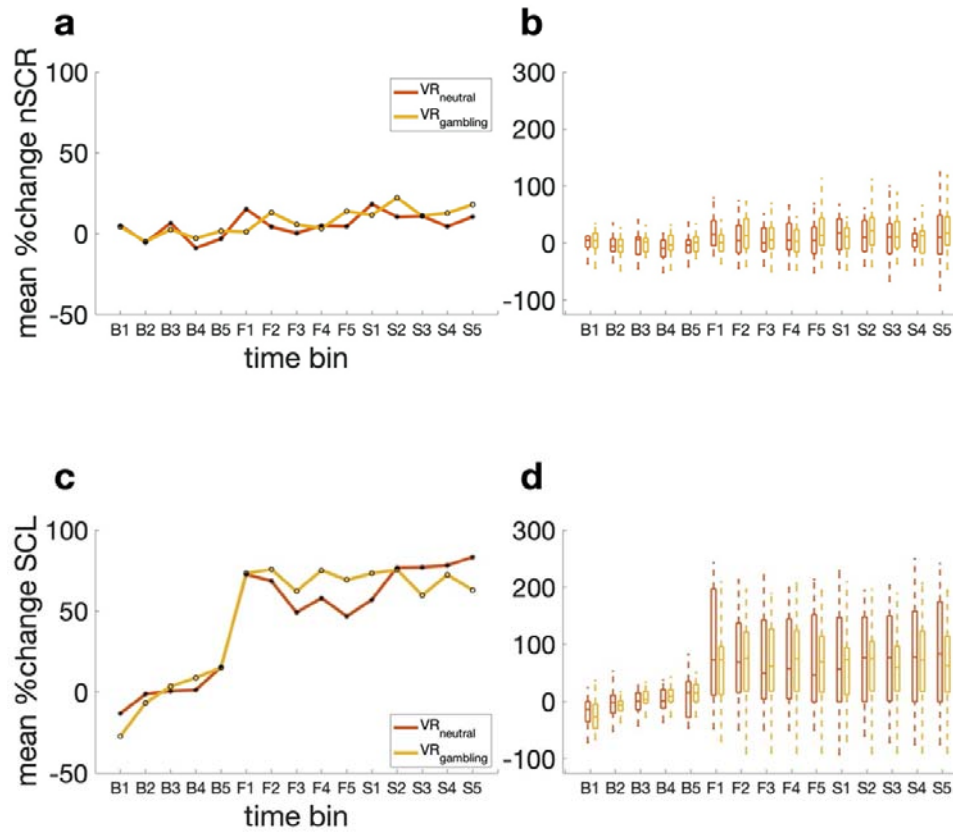

550

551 **Figure 6.** Results of the EDA measurements divided into 15 time points over the course of the baseline phase, measured  
552 before participants entered the VR-environments, and the first and second exploration phases. Each of the three phases  
553 is divided into five one-minute bins (B1-5: pre-VR baseline, F1-5: first exploration phase in VR, S1-5: second exploration  
554 phase VR). a: Median percent change from baseline mean for no. of spontaneous SCRs over all participants. b: Boxplot of  
555 percentage change from baseline mean for no. spontaneous SCRs over all participants. c: Median percent change from  
556 baseline mean of SCL over all participants. d: Boxplots of percentage change from base line mean of SCL over all  
557 participants.

558

## 559 Discussion

560 Here we carried out an extensive investigation into the reliability of temporal discounting  
561 measures obtained in different virtual reality environments as well as standard lab-based  
562 testing. This design allowed us the joint assessment of physiological arousal and decision-  
563 making, an approach with potential applications to cue-reactivity studies in substance use  
564 disorders or behavioral addictions such as gambling disorder. Participants performed a  
565 temporal discounting task within two different VR-environments (a café environment and a  
566 casino/sports betting environment:  $VR_{neutral}$  vs.  $VR_{gambling}$ ) as well as in a standard computer-  
567 based lab testing session. Exposure to VR generally increased sympathetic arousal as assessed  
568 via electrodermal activity (EDA), but these effects were not differentially modulated by the  
569 different VR environments. Results revealed good to excellent test-retest reliability of model-  
570 based ( $\log(k)$ ) and model-free (AUC) measures of temporal discounting across all testing  
571 environments. However, the  $DDM_S$  parameters modelling latent decision processes showed  
572 substantially lower test-retest reliabilities between the three sessions. The split-half reliability  
573 within each session was mostly good to excellent indicating that the lower test-retest  
574 reliability was likely caused by the participants current state and not by factors within the  
575 modelling process itself.

576 To test how well temporal discounting, as a measure of choice impulsivity, performs  
577 in virtual environments we implemented a VR-design that is built for possible future  
578 application in a cue-reactivity context. Healthy controls displayed little evidence for  
579 systematic differences in choice preferences between the Lab-session and the VR-sessions.  
580 This was observed for model-free measures (AUC), as well as the  $\log(k)$  parameter of the  
581 hyperbolic discounting model with the softmax choice rule and the drift diffusion model with  
582 non-linear drift rate scaling ( $DDM_S$ ). Model comparison revealed that the  $DDM_S$  accounted  
583 for the data best, confirming previous findings<sup>[43,45,46,48]</sup>. Although generally, discount rates  
584 assessed in the three sessions were of similar magnitude, in the  $DDM_S$  there was moderate  
585 evidence for reduced discounting (i.e., smaller values of  $\log(k)$ ) in the  $VR_{neutral}$  session. The  
586 reasons for this could be manifold. One possibility is that environmental novelty plays a role,  
587 such that perceived novelty of the  $VR_{neutral}$  session might have been lower than for the  
588  $VR_{gambling}$  and Lab-sessions. Exposure to novelty can stimulate dopamine release<sup>[77]</sup>, which  
589 is known to impact temporal discounting<sup>[78]</sup>. Nonetheless, effect sizes were medium (.37 and  
590 .29) and the  $dBFs$  revealed only moderate evidence. Numerically, the mean  $\log(k)$ 's of the  
591 softmax model showed the same tendency, but here effects were less pronounced. One  
592 possibility is that the inclusion of additional latent variables in the  $DDM_S$  might have



593 increased sensitivity to detect this effect. There was also evidence for a session effect on the  
594 scaling parameter ( $v_{\text{coeff}}$ ). Here, the impact of trial-wise value differences on the drift rate was  
595 attenuated in the Lab-session, with dBFs revealing strong ( $\text{VR}_{\text{neutral}}$ ) or moderate evidence  
596 ( $\text{VR}_{\text{gambling}}$ ) for a reduction in  $v_{\text{coeff}}$  in the Lab-session. Again, effect sizes were medium.  
597 Nevertheless, the data suggest increased sensitivity to value differences in VR. This effect  
598 might be due to the option presentation in the Lab-session compared to the VR-sessions. The  
599 presentation of options within VR might have been somewhat more salient, which might have  
600 increased attention allocated to the value differences within the VR-sessions. However, this  
601 remains speculative until further research reproduces and further assesses these specific  
602 effects on the DDM parameters. Boundary separation ( $\alpha$ ), drift rate asymptote ( $v_{\text{max}}$ ) and  
603 starting point ( $z$ ) showed little evidence for systematic differences between sessions. The only  
604 DDMs parameter showing extreme evidence for a systematic difference between the lab- and  
605 VR-sessions was the non-decision time ( $\tau$ ). This effect is unsurprising, as it describes RT  
606 components attributable to perception and/or motor execution. Given that indicating a  
607 response with a controller in three-dimensional space takes longer than a simple button press,  
608 this leads to substantial increases in  $\tau$  during VR testing. Finally, the good test-retest  
609 reliability of  $\log(k)$  from the DDMs furthermore indicates that RTs obtained in VR can  
610 meaningfully be modeled using the DDM. The potential utility of this modeling approach in  
611 the context of gambling disorder is illustrated by a recent study that reported reduced  
612 boundary separation ( $\alpha$ ) in participants suffering from gambling disorder compared to healthy  
613 controls in a reinforcement learning task<sup>[48]</sup>. Given that there are mixed results when it comes  
614 to the effect of addiction related cues on RTs<sup>[79–81]</sup>, the effects of these cues on the latent  
615 decision variables included in the DDM could provide additional insights. Taken together,  
616 these results show that VR immersion in general does not influence participants inter-  
617 temporal preferences in a systematic fashion and might open up a road to more ecologically  
618 valid lab experiments, e.g., focusing on behavioral cue-reactivity in addiction. This is in line  
619 with other results showing the superiority of VR compared to classical laboratory  
620 experiments<sup>[6]</sup>.

621 The present data add to the discussion concerning the reliability of behavioral  
622 tasks<sup>[9,50–53,55]</sup> in particular in the context of computational psychiatry<sup>[15,82]</sup>. To examine test-  
623 retest reliability, the three sessions were performed on different days and with a mean interval  
624 of 3.85 days between sessions. The test-retest reliability for the AUC and the  $\log(k)$  parameter  
625 of the hyperbolic discounting model with softmax choice rule were both excellent. For the  
626  $\log(k)$  of the DDMs the ICC was good, but slightly lower than for AUC and softmax.

627 Nevertheless, the discount rate  $\log(k)$  was overall stable regardless of the analytical approach.  
628 The ICC of .7 observed for the DDM<sub>S</sub> was comparable to earlier studies on temporal  
629 discounting reliability<sup>[52,53]</sup>. Kirby and colleagues<sup>[52]</sup> for instance demonstrated a reliability of  
630 .77 for a five-week interval and .71 for one year. This shows that at least over shorter periods  
631 from days to weeks, temporal discounting performed in VR has a reliability comparable to  
632 standard lab-based testing. Enkavi and colleagues<sup>[49]</sup> stress that in particular difference scores  
633 between conditions (e.g. Stroop, Go-NoGo etc.), show unsatisfactory reliability due to the low  
634 between participants variation created by commonly used behavioral tasks. Assessment of  
635 difference scores was not applicable in the present study. Nevertheless, there was no positive  
636 evidence for systematic effects on  $\log(k)$  (with the exception of the potential novelty effects  
637 discussed above), and the test-retest reliability between all conditions was at least good across  
638 analysis schemes, indicating short-term stability of temporal discounting measured in VR. It  
639 is worth noting, however, that temporal discounting shares some similarities with  
640 questionnaire-based measures. As in questionnaires, in temporal discounting tasks  
641 participants are explicitly instructed to indicate their preferences. This might be one reason  
642 why the reliability of temporal discounting is often substantially higher than that of other  
643 behavioral tasks<sup>[49,52,53,55]</sup>. Other parameters of the DDM<sub>S</sub> showed lower levels of test-retest  
644 reliability. Especially the  $v_{\text{coeff}}$  parameters were less reliable, at least when estimated jointly  
645 with  $v_{\text{max}}$ . In the DDM<sub>L</sub>, which does not suffer from potential trade-offs between these  
646 different drift rate components, the ICC of  $v_{\text{coeff}}$  was good (Supplementary Table S2).  
647 Similarly, here  $\log(k)$  also showed an excellent ICC.

648 The substantially lower test-retest reliability exhibited by the parameters of the DDM<sub>S</sub>  
649 that represent latent decisions processes, compared to  $\log(k)$  or AUC warrants further  
650 discussion. Prior publications from our lab<sup>[24,41]</sup> have extensively reported parameter recovery  
651 of the DDMs model and revealed a good recovery performance. The low test-retest reliability  
652 is therefore unlikely to be due to poor identifiability of model parameters. One possible  
653 reason for this discrepancy between  $\log(k)$ /AUC and the other parameters is that the tendency  
654 to discount value over time might be a stable trait-like factor, while the latent decision  
655 processes reflected in the other DDM<sub>S</sub> parameters might be more substantially influenced by  
656 state effects. While this could explain the low test-retest reliability, it would predict that these  
657 parameters should nonetheless be stable within sessions. We addressed this issue in a further  
658 analysis of within-session split-half reliability (see Supplementary Tables S3-5). The results  
659 showed a good-to-excellent within-session stability for most parameters, with the drift rate  
660 coefficient  $v_{\text{coeff}}$  being a notable exception. This is compatible with the idea that latent

661 decision processes reflected in the  $DDM_S$  parameters might be affected by factors that differ  
662 across testing days, but are largely stable within sessions, such as mood, fatigue or  
663 motivation.

664 VR has previously been used to study cue-reactivity in participants suffering from  
665 gambling disorder<sup>[2,3,83]</sup>, but also in participants experiencing nicotine<sup>[84]</sup> and alcohol<sup>[11]</sup> use  
666 disorders. Our experimental set-up extends these previous approaches in several ways. First,  
667 we included both a neutral and a gambling-related environment. This allows us to disentangle  
668 general VR effects from specific contextual effects. Second, our reliability checks for  
669 temporal discounting show that model-based constructs with clinical relevance for  
670 addiction<sup>[18,23]</sup> can be reliably assessed when behavioral testing is implemented directly in the  
671 VR environment. Together, these advances might yield additional insights into the  
672 mechanisms underlying cue-reactivity in addiction, and contextual effects in psychiatric  
673 disorders more generally.

674 Understanding how addictions manifest on a computational and physiological level is  
675 important to further the understanding the mechanisms underlying maladaptive decision-  
676 making. Although alterations in neural reward circuits, in particular in ventral striatum and  
677 ventromedial prefrontal cortex, are frequently observed in gambling disorder, there is  
678 considerable heterogeneity in the directionality of these effects<sup>[85]</sup>. Gambling-related visual  
679 cues interfere with striatal valuation signals in participants suffering from gambling disorder,  
680 and might thereby increase temporal discounting<sup>[12]</sup>. In the present work, assessment of  
681 physiological reactivity to VR was limited to electrodermal activity (EDA). EDA is an index  
682 of autonomic sympathetic arousal, which is in turn related to the emotional response to  
683 addiction related cues<sup>[39,86-88]</sup>. The skin conductance level (SCL) is increased in participants  
684 with substance use disorders in response to drug related cues<sup>[86]</sup>. Additionally, it has been  
685 shown that addiction related cues in VR can elicit SCR responses in teen<sup>[87]</sup> and adult<sup>[88]</sup>  
686 participants suffering from a nicotine addiction. In our study, we mainly used this  
687 physiological marker to assess how healthy participants react to VR exposure. For the number  
688 of spontaneous responses in the EDA signal (nSCRs), the increase upon exposure to VR (B5  
689 vs F1) was only significant in the  $VR_{neutral}$  environment. The effect size for the difference  
690 between both environments was medium. Given that the two starting areas of the VR-  
691 environments were identical, this difference might have been caused by random fluctuations.  
692 However, an increase in the number of spontaneous SCRs during VR immersion has been  
693 reported previously<sup>[5]</sup> and thus warrants further investigation. The SCL, on the other hand,  
694 increased substantially upon exposure to VR, as indicated by a significant increase between

695 the last minute of baseline recording (B5) and the first minute of the first exploration phase  
696 (F1). The effect sizes indicated a large effect. SCL then remained elevated throughout both  
697 exploration phases (F1 to S5) but did not increase further when the virtual café/casino area  
698 was entered. These results suggest that exposure to VR increases sympathetic arousal as  
699 measured with SCL in healthy control participants independent of the presented VR  
700 environment.

701 There are several limitations that need to be acknowledged. First, there was  
702 considerable variability in test-retest intervals across participants. While most of the sessions  
703 were conducted within a week, in some participants this interval was up to three weeks,  
704 reducing the precision of conclusions regarding temporal stability of discounting in VR. Other  
705 studies, however, have used intervals ranging from five to fifty-seven weeks<sup>[52]</sup> or three  
706 months<sup>[53]</sup>, and have reported comparable reliabilities. Moreover, there is evidence for a  
707 heritability of temporal discounting of around 30 and 50 percent at the ages of 12 and 14  
708 years respectively<sup>[89]</sup>. This increases the confidence in the results obtained here. Nevertheless,  
709 a more systematic assessment of how long these trait indicators remain stable in VR would be  
710 desirable and could be addressed by future research. Second, the sample size was lower  
711 compared to larger studies conducted online<sup>[49]</sup>, and the majority of participants was female.  
712 Both factors limit the generalizability of our results. However, large-scale online studies have  
713 shortcomings of their own, including test batteries that take multiple hours and/or multiple  
714 sessions to complete<sup>[49,50]</sup>, potentially increasing participants' fatigue, and which might have  
715 detrimental effects on data quality. We also note that the present sample size was sufficiently  
716 large to reveal stable parameter estimates, showing that in our design participants performed  
717 the task adequately. Thirdly, the immersion in VR might have been reduced by the available  
718 physical lab space. To ensure safety, the experimenter had to at times instruct participants to  
719 stay within the designated VR-zone. This distraction might have reduced the effects caused by  
720 the VR-environments, because participants were not able to fully ignore the actual physical  
721 surroundings. Additionally, it might have influenced the EDA measurements in an  
722 unpredictable way. Future research would benefit from the implementation of markers within  
723 the VR-environments in order to ensure safety without breaking immersion. Moreover,  
724 participants had to spend about thirty minutes in the full VR-setup. The behavioral tasks were  
725 presented after the exploration phase, such that participants might have been fatigued or  
726 experienced discomfort during task completion. Finally, the study at hand did not include  
727 participants that gamble frequently or are suffering from gambling disorder and is therefore  
728 not a cue-reactivity study itself, but rather a methodological validation for future studies using

729 this and similar designs. Due to the fact that participants here were supposed to be fairly  
730 unfamiliar with gambling environments this study could not determine how ecologically valid  
731 the gambling environment actually is. This needs to be addressed in future research. In  
732 relation to that, cue-reactivity in gambling disorder is determined by many individual  
733 factors<sup>[37]</sup>. The VR-design presented here is designed for slot machine and sports betting  
734 players, and thus not applicable for other forms of gambling.

735 Overall, our results demonstrate the methodological feasibility of a VR-based  
736 approach to behavioral and physiological testing in VR with potential applications to cue-  
737 reactivity in addiction. Healthy non-gambling control participants showed little systematic  
738 behavioral and physiological effects of the two VR environments. Moreover, our data show  
739 that temporal discounting is reliable behavioral marker, even if tested in very different  
740 experimental settings (e.g. standard lab testing vs. VR). It remains to be seen if such  
741 gambling-related environments produce cue-reactivity in participants suffering from gambling  
742 disorder. However, results from similar applications have been encouraging<sup>[2,3]</sup>. These results  
743 show the promise of VR applications jointly assessing of behavioral and physiological cue-  
744 reactivity in addiction science.

745

## 746 References

- 747 1. Ghiță, A. *et al.* Cue-Elicited Anxiety and Alcohol Craving as Indicators of the Validity  
748 of ALCO-VR Software: A Virtual Reality Study. *J. Clin. Med.* **8**, 1153 (2019).
- 749 2. Bouchard, S. *et al.* Using Virtual Reality in the Treatment of Gambling Disorder: The  
750 Development of a New Tool for Cognitive Behavior Therapy. *Front. psychiatry* **8**, 27  
751 (2017).
- 752 3. Giroux, I. *et al.* Gambling exposure in virtual reality and modification of urge to  
753 gamble. *Cyberpsychol. Behav. Soc. Netw.* **16**, 224–231 (2013).
- 754 4. Wang, Y. guang, Liu, M. hui & Shen, Z. hua. A virtual reality counterconditioning  
755 procedure to reduce methamphetamine cue-induced craving. *J. Psychiatr. Res.* **116**,  
756 88–94 (2019).
- 757 5. Peterson, S. M., Furuichi, E. & Ferris, D. P. Effects of virtual reality high heights  
758 exposure during beam-walking on physiological stress and cognitive loading. *PLoS*  
759 *One* **13**, 1–17 (2018).
- 760 6. Rubo, M. & Gamer, M. Stronger reactivity to social gaze in virtual reality compared to  
761 a classical laboratory environment. *Br. J. Psychol.* 1–14 (2020)  
762 doi:10.1111/bjop.12453.
- 763 7. Detez, L. *et al.* A Psychophysiological and Behavioural Study of Slot Machine Near-  
764 Misses Using Immersive Virtual Reality. *J. Gambl. Stud.* **35**, 929–944 (2019).
- 765 8. Dickinson, P., Gerling, K., Wilson, L. & Parke, A. Virtual reality as a platform for  
766 research in gambling behaviour. *Comput. Hum. Behav.* **107**, (2020).
- 767 9. Amlung, M. *et al.* Delay Discounting as a Transdiagnostic Process in Psychiatric  
768 Disorders: A Meta-analysis. *JAMA psychiatry* (2019)  
769 doi:10.1001/jamapsychiatry.2019.2102.
- 770 10. Kirby, K. N. & Petry, N. M. Heroin and cocaine abusers have higher discount rates for  
771 delayed rewards than alcoholics or non-drug-using controls. *Addiction* **99**, 461–471  
772 (2004).
- 773 11. Peters, J. *et al.* Lower ventral striatal activation during reward anticipation in  
774 adolescent smokers. *Am. J. Psychiatry* **168**, 540–549 (2011).
- 775 12. Miedl, S. F., Büchel, C. & Peters, J. Cue-induced craving increases impulsivity via  
776 changes in striatal value signals in problem gamblers. *J. Neurosci.* **34**, 4750–4755  
777 (2014).
- 778 13. Potenza, M. N. Review. The neurobiology of pathological gambling and drug  
779 addiction: An overview and new findings. *Philos. Trans. R. Soc. Lond. B. Biol. Sci.*  
780 **363**, 3181–3189 (2008).
- 781 14. Wiehler, A. & Peters, J. Reward-based decision making in pathological gambling: The  
782 roles of risk and delay. *Neurosci. Res.* **90**, 3–14 (2015).
- 783 15. Huys, Q. J. M., Maia, T. V & Frank, M. J. Computational psychiatry as a bridge from  
784 neuroscience to clinical applications. *Nat. Neurosci.* **19**, 404–413 (2016).
- 785 16. Farrell, S. & Lewandowsky, S. *Computational modeling of cognition and behavior.*  
786 *Computational Modeling of Cognition and Behavior* (Cambridge University Press,  
787 2018). doi:10.1017/CBO9781316272503.
- 788 17. Miedl, S. F., Peters, J. & Büchel, C. Altered neural reward representations in  
789 pathological gamblers revealed by delay and probability discounting. *Arch. Gen.*  
790 *Psychiatry* **69**, 177–186 (2012).
- 791 18. Bickel, W. K., Koffarnus, M. N., Moody, L. & Wilson, A. G. The behavioral- and  
792 neuro-economic process of temporal discounting: A candidate behavioral marker of  
793 addiction. *Neuropharmacology* **76 Pt B**, 518–527 (2014).
- 794 19. Lempert, K. M., Steinglass, J. E., Pinto, A., Kable, J. W. & Simpson, H. B. Can delay  
795 discounting deliver on the promise of RDoC? *Psychol. Med.* **49**, 190–199 (2019).

- 796 20. Dixon, M. R., Jacobs, E. A., Sanders, S. & Carr, J. E. Contextual Control of Delay  
797 Discounting by Pathological Gamblers. *J. Appl. Behav. Anal.* **39**, 413–422 (2006).
- 798 21. Genauck, A. *et al.* Cue-induced effects on decision-making distinguish subjects with  
799 gambling disorder from healthy controls. *Addict. Biol.* **25**, 1–10 (2020).
- 800 22. Robinson, T. E. & Berridge, K. C. The neural basis of drug craving: An incentive-  
801 sensitization theory of addiction. *Brain Res. Rev.* **18**, 247–291 (1993).
- 802 23. Bickel, W. K., Yi, R., Landes, R. D., Hill, P. F. & Baxter, C. Remember the future:  
803 Working memory training decreases delay discounting among stimulant addicts. *Biol.*  
804 *Psychiatry* **69**, 260–265 (2011).
- 805 24. Bickel, W. K., Moody, L. & Quisenberry, A. Computerized Working-Memory  
806 Training as a Candidate Adjunctive Treatment for Addiction. *Alcohol Res. Curr. Rev.*  
807 (2014).
- 808 25. Carter, B. L. & Tiffany, S. T. Meta-analysis of cue-reactivity in addiction research.  
809 *Addiction* (1999).
- 810 26. Starcke, K., Antons, S., Trotzke, P. & Brand, M. Cue-reactivity in behavioral  
811 addictions: A meta-analysis and methodological considerations. *J. Behav. Addict.* **7**,  
812 227–238 (2018).
- 813 27. Berridge, K. C. & Robinson, T. E. Liking, wanting, and the incentive-sensitization  
814 theory of addiction. *Am. Psychol.* **71**, 670–679 (2016).
- 815 28. Anselme, P. Motivational control of sign-tracking behaviour: A theoretical framework.  
816 *Neurosci. Biobehav. Rev.* **65**, 1–20 (2016).
- 817 29. Berridge, K. C. From prediction error to incentive salience: Mesolimbic computation of  
818 reward motivation. *Eur. J. Neurosci.* **35**, 1124–1143 (2012).
- 819 30. Volkow, N. D. *et al.* Cocaine cues and dopamine in dorsal striatum: Mechanism of  
820 craving in cocaine addiction. *J. Neurosci.* **26**, 6583–6588 (2006).
- 821 31. van Holst, R. J., van Holstein, M., van den Brink, W., Veltman, D. J. & Goudriaan, A.  
822 E. Response inhibition during cue reactivity in problem gamblers: An fmri study. *PLoS*  
823 *One* **7**, 1–10 (2012).
- 824 32. Brevers, D., He, Q., Keller, B., Noël, X. & Bechara, A. Neural correlates of proactive  
825 and reactive motor response inhibition of gambling stimuli in frequent gamblers. *Sci.*  
826 *Rep.* **7**, 1–11 (2017).
- 827 33. Brevers, D., Sescousse, G., Maurage, P. & Billieux, J. Examining Neural Reactivity to  
828 Gambling Cues in the Age of Online Betting. *Curr. Behav. Neurosci. Reports* **6**, 59–71  
829 (2019).
- 830 34. Crockford, D. N., Goodyear, B., Edwards, J., Quickfall, J. & El-Guebaly, N. Cue-  
831 induced brain activity in pathological gamblers. *Biol. Psychiatry* **58**, 787–795 (2005).
- 832 35. Goudriaan, A. E., De Ruiter, M. B., Van Den Brink, W., Oosterlaan, J. & Veltman, D.  
833 J. Brain activation patterns associated with cue reactivity and craving in abstinent  
834 problem gamblers, heavy smokers and healthy controls: An fMRI study. *Addict. Biol.*  
835 **15**, 491–503 (2010).
- 836 36. Kober, H. *et al.* Brain Activity during Cocaine Craving and Gambling Urges: An fMRI  
837 Study. *Neuropsychopharmacology* **41**, 628–637 (2016).
- 838 37. Limbrick-Oldfield, E. H. *et al.* Neural substrates of cue reactivity and craving in  
839 gambling disorder. *Transl. Psychiatry* **7**, e992 (2017).
- 840 38. Potenza, M. N. *et al.* Gambling Urges in Pathological Gambling. *Arch. Gen. Psychiatry*  
841 **60**, 828 (2003).
- 842 39. Braithwaite, J. J., Watson, D. G., Jones, R. & Rowe, M. A Guide for Analysing  
843 Electrodermal Activity (EDA) & Skin Conductance Responses (SCRs) for  
844 Psychological Experiments. *Psychophysiology* **2013**, (2013).
- 845 40. Forstmann, B. U., Ratcliff, R. & Wagenmakers, E.-J. Sequential Sampling Models in  
846 Cognitive Neuroscience: Advantages, Applications, and Extensions. *Annu. Rev.*

- 847        *Psychol.* **67**, 641–666 (2016).
- 848    41.    Ballard, I. C. & McClure, S. M. Joint modeling of reaction times and choice improves  
849        parameter identifiability in reinforcement learning models. *J. Neurosci. Methods* **317**,  
850        37–44 (2019).
- 851    42.    Shahar, N. *et al.* Improving the reliability of model-based decision-making estimates in  
852        the two-stage decision task with reaction-times and drift-diffusion modeling. *PLoS*  
853        *Comput. Biol.* **15**, e1006803 (2019).
- 854    43.    Fontanesi, L., Gluth, S., Spektor, M. S. & Rieskamp, J. A reinforcement learning  
855        diffusion decision model for value-based decisions. *Psychon. Bull. Rev.* **26**, 1099–1121  
856        (2019).
- 857    44.    Pedersen, M. L., Frank, M. J. & Biele, G. The drift diffusion model as the choice rule  
858        in reinforcement learning. *Psychon. Bull. Rev.* **24**, 1234–1251 (2017).
- 859    45.    Peters, J. & D’Esposito, M. The drift diffusion model as the choice rule in inter-  
860        temporal and risky choice: A case study in medial orbitofrontal cortex lesion patients  
861        and controls. *PLoS Comput. Biol.* **16**, 1–26 (2020).
- 862    46.    Wagner, B., Clos, M., Sommer, T. & Peters, J. Dopaminergic modulation of human  
863        inter-temporal choice: a diffusion model analysis using the D2-receptor-antagonist  
864        haloperidol. *bioRxiv* (2020).
- 865    47.    Miletic, S., Boag, R. J. & Forstmann, B. U. Mutual benefits: Combining reinforcement  
866        learning with sequential sampling models. *Neuropsychologia* **136**, (2020).
- 867    48.    Wiehler, A. & Peters, J. Diffusion modeling reveals reinforcement learning  
868        impairments in gambling disorder that are linked to attenuated ventromedial prefrontal  
869        cortex value representations. *bioRxiv* 2020.06.03.131359 (2020)  
870        doi:10.1101/2020.06.03.131359.
- 871    49.    Enkavi, A. Z. *et al.* Large-scale analysis of test-retest reliabilities of self-regulation  
872        measures. *Proc. Natl. Acad. Sci. U. S. A.* **116**, 5472–5477 (2019).
- 873    50.    Eisenberg, I. W. *et al.* Applying novel technologies and methods to inform the  
874        ontology of self-regulation. *Behav. Res. Ther.* **101**, 46–57 (2018).
- 875    51.    Hedge, C., Powell, G. & Sumner, P. The reliability paradox: Why robust cognitive  
876        tasks do not produce reliable individual differences. *Behav. Res. Methods* **50**, 1166–  
877        1186 (2018).
- 878    52.    Kirby, K. N. One-year temporal stability of delay-discount rates. *Psychon. Bull. Rev.*  
879        **16**, 457–462 (2009).
- 880    53.    Ohmura, Y., Takahashi, T., Kitamura, N. & Wehr, P. Three-month stability of delay  
881        and probability discounting measures. *Exp. Clin. Psychopharmacol.* **14**, 318–328  
882        (2006).
- 883    54.    Peters, J. & Büchel, C. Overlapping and distinct neural systems code for subjective  
884        value during intertemporal and risky decision making. *J. Neurosci.* **29**, 15727–15734  
885        (2009).
- 886    55.    Odum, A. L. Delay discounting: Trait variable? *Behav. Processes* **87**, 1–9 (2011).
- 887    56.    Petry, J. *Psychotherapie der Glücksspielsucht*. (Psychologie Verlags Union, 1996).
- 888    57.    Daw, N. D., Gershman, S. J., Seymour, B., Dayan, P. & Dolan, R. J. Model-based  
889        influences on humans’ choices and striatal prediction errors. *Neuron* **69**, 1204–1215  
890        (2011).
- 891    58.    Kool, W., Cushman, F. A. & Gershman, S. J. When Does Model-Based Control Pay  
892        Off? *PLoS Comput. Biol.* **12**, e1005090 (2016).
- 893    59.    Johnson, M. W. & Bickel, W. K. Within-Subject Comparison of Real and Hypothetical  
894        Money Rewards in Delay Discounting. *J. Exp. Anal. Behav.* **77**, 129–146 (2002).
- 895    60.    Bickel, W. K., Pitcock, J. A., Yi, R. & Angtuaco, E. J. C. Congruence of BOLD  
896        response across intertemporal choice conditions: Fictive and real money gains and  
897        losses. *J. Neurosci.* **29**, 8839–8846 (2009).



- 898 61. Myerson, J., Green, L. & Warusawitharana, M. Area Under the Curve As a Measure of  
899 Discounting. *J. Exp. Anal. Behav.* **76**, 235–243 (2001).
- 900 62. Green, L., Myerson, J. & Macaux, E. W. Temporal discounting when the choice is  
901 between two delayed rewards. *J. Exp. Psychol. Learn. Mem. Cogn.* **31**, 1121–1133  
902 (2005).
- 903 63. Mazur, J. E. An adjusting procedure for studying delayed reinforcement. **1987**, 55–73  
904 (1987).
- 905 64. Sutton & Barto. *Reinforcement Learning: An Introduction*. (MIT Press, 1998).
- 906 65. R Core Team. R: A Language and Environment for Statistical Computing. (2013).
- 907 66. Plummer, M. A Program for analysis of Bayesian graphical models. *Work. Pap.*  
908 (2003).
- 909 67. Wabersich, D. & Vandekerckhove, J. Extending JAGS: A tutorial on adding custom  
910 distributions to JAGS (with a diffusion model example). *Behav. Res. Methods* **46**, 15–  
911 28 (2014).
- 912 68. Gelman, A. & Rubin, D. B. Inference from Iterative Simulation Using Multiple  
913 Sequences. *Stat. Sci.* **7** **4**, 457–472 (1992).
- 914 69. Spiegelhalter, D. J., Best, N. G., Carlin, B. P. & Van Der Linde, A. Bayesian measures  
915 of model complexity and fit. *J.R. Stat. Soc. Ser. B Stat. Methodol.* **64**, 583–639 (2002).
- 916 70. Marsman, M. & Wagenmakers, E. J. Three Insights from a Bayesian Interpretation of  
917 the One-Sided P Value. *Educ. Psychol. Meas.* **77**, 529–539 (2017).
- 918 71. Beard, E., Dienes, Z., Muirhead, C. & West, R. Using Bayes factors for testing  
919 hypotheses about intervention effectiveness in addictions research. *Addiction* **111**,  
920 2230–2247 (2016).
- 921 72. Koo, T. K. & Li, M. Y. A Guideline of Selecting and Reporting Intraclass Correlation  
922 Coefficients for Reliability Research. *J. Chiropr. Med.* **15**, 155–163 (2016).
- 923 73. Bach, D. R., Friston, K. J. & Dolan, R. J. Analytic measures for quantification of  
924 arousal from spontaneous skin conductance fluctuations. *Int. J. Psychophysiol.* **76**, 52–  
925 55 (2010).
- 926 74. Benedek, M. & Kaernbach, C. A continuous measure of phasic electrodermal activity.  
927 *J. Neurosci. Methods* **190**, 80–91 (2010).
- 928 75. Kerby, D. The Simple Difference Formula: An Approach to Teaching Nonparametric  
929 Correlation. *Compr. Psychol.* **3**, (2014).
- 930 76. Rosenthal, R., Cooper, H. & Hedges, L. Parametric measures of effect size. *Handb.*  
931 *Res. Synth.* **621(2)**, 231–244 (1994).
- 932 77. Duzkiewicz, A. J., McNamara, C. G., Takeuchi, T. & Genzel, L. Novelty and  
933 Dopaminergic Modulation of Memory Persistence: A Tale of Two Systems. *Trends*  
934 *Neurosci.* **42**, 102–114 (2019).
- 935 78. D’Amour-Horvat, V. & Leyton, M. Impulsive actions and choices in laboratory  
936 animals and humans: Effects of high vs. low dopamine states produced by systemic  
937 treatments given to neurologically intact subjects. *Front. Behav. Neurosci.* **8**, 1–20  
938 (2014).
- 939 79. Juliano, L. M. & Brandon, T. H. Reactivity to instructed smoking availability and  
940 environmental cues: evidence with urge and reaction time. *Exp. Clin.*  
941 *Psychopharmacol.* **6(1)**, (1998).
- 942 80. Sayette, M. A. *et al.* The effects of cue exposure on reaction time in male alcoholics. *J.*  
943 *Stud. Alcohol* 629–633 (1994).
- 944 81. Vollstädt-Klein, S. *et al.* Validating incentive salience with functional magnetic  
945 resonance imaging: Association between mesolimbic cue reactivity and attentional bias  
946 in alcohol-dependent patients. *Addict. Biol.* **17**, 807–816 (2012).
- 947 82. Hedge, C., Bompas, A. & Sumner, P. Task reliability considerations in computational  
948 psychiatry. *Biol. Psychiatry Cogn. Neurosci. Neuroimaging* (2020).

- 949 83. Bouchard, S., Loranger, C., Giroux, I., Jacques, C. & Robillard, G. Using Virtual  
950 Reality to Provide a Naturalistic Setting for the Treatment of Pathological Gambling. in  
951 *The Thousand Faces of Virtual Reality* (ed. Sik-Lanyi, C.) (InTech, 2014).  
952 doi:10.5772/59240.
- 953 84. Gamito, P. *et al.* Eliciting nicotine craving with virtual smoking cues.  
954 *Cyberpsychology, Behav. Soc. Netw.* **17**, 556–561 (2014).
- 955 85. Clark, L., Boileau, I. & Zack, M. Neuroimaging of reward mechanisms in Gambling  
956 disorder: an integrative review. *Mol. Psychiatry* **24**, 674–693 (2019).
- 957 86. Havermans, R. C., Mulkens, S., Nederkoorn, C. & Jansen, A. The efficacy of cue  
958 exposure with response prevention in extinguishing drug and alcohol cue reactivity. *Behav. Interv. Pract. Resid. Community-Based Clin. Programs* **22**(2), 121–135  
959 (2007).
- 960  
961 87. Bordnick, P. S., Traylor, A. C., Graap, K. M., Copp, H. L. & Brooks, J. Virtual reality  
962 cue reactivity assessment: A case study in a teen smoker. *Appl. Psychophysiol.*  
963 *Biofeedback* **30**, 187–193 (2005).
- 964 88. Choi, J. S. *et al.* The effect of repeated virtual nicotine cue exposure therapy on the  
965 psychophysiological responses: A preliminary study. *Psychiatry Investig.* **8**, 155–160  
966 (2011).
- 967 89. Anokhin, A. P., Golosheykin, S., Grant, J. D. & Heath, A. C. Heritability of delay  
968 discounting in adolescence: A longitudinal twin study. *Behav. Genet.* **41**, 175–183  
969 (2011).
- 970

971 **Acknowledgments**

972 We thank Mohsen Shaverdy and Diego Saldivar for the implementation of the VR  
973 environments and task programming and all members of the Peters Lab at the University of  
974 Cologne for helpful discussions. This work was supported by Deutsche  
975 Forschungsgemeinschaft (DFG, grant PE1627/5-1 to J.P.).

976

977 **Additional Information**

978 The authors declare no competing interests.

979

980 **Author Contributions**

981 Conceptualization: J. P., L. B.

982 Data curation: L. B.

983 Formal analysis: L. B.

984 Funding acquisition: J. P.

985 Investigation: L. B., L. S.

986 Methodology: J. P., L. B.

987 Project administration: L. B.

988 Writing – original draft: L. B.

989 Writing – review & editing: J. P., L. B., L. S.

990

991 **Figure and Table Legends**

992 **Figure 1.** Experimental areas of the VR-environments. a) Floorplan of the café within the VR-neutral environment. b) View  
993 of the main room of the café. c) View of the buffet area of the café. d) Floorplan of the casino within the VR-gambling  
994 environment. e) View of the main room of the casino. f) View of the sports bar within the casino.

995

996 **Figure 2.** Presentation of the temporal discounting task in VR. Participants had to repeatedly decide between a small but  
997 immediate reward (SS) and larger but temporally delayed rewards (LL). Amounts and delays were presented in yellow  
998 squares. During the inter-trial intervals (.5-1 sec.) these squares contained only question marks. Participants indicated their  
999 choice by pointing the VR-controller at one of the yellow squares and pulling the trigger.

1000

1001 **Figure 3.** Posterior distributions of the parameters of the hyperbolic discounting model. Colored bars represent the  
1002 corresponding 95% HDIs. a) Posterior distribution of the  $\log(k)$  parameter (reflecting the degree of temporal discounting) for  
1003 all three sessions. b) Posterior distribution of the  $\beta$  or inverse temperature parameter (reflecting decision noise). c) Pairwise  
1004 difference distributions between the posteriors of the  $\log(k)$  parameters of all three sessions. d) Pairwise difference  
1005 distributions between the posteriors of the  $\beta$  parameters of all three sessions.

1006

1007 **Figure 4.** Posterior distributions of the parameters of the DDM<sub>S</sub> model. Colored bars represent the corresponding 95% HDIs.  
1008 a) Posterior distributions of the  $\log(k)$  parameter for all three sessions. b) Posterior distributions of the  $v_{\text{coeff}}$  parameter  
1009 (mapping the drift rate onto the trial wise value difference). c) Posterior distributions of the  $v_{\text{max}}$  parameter (setting an  
1010 asymptote for the relation between the trial wise value difference and the drift rate). d) Pairwise difference distributions  
1011 between the posterior distributions of the  $\log(k)$  parameters of the three sessions. e) Pairwise difference distributions between  
1012 the posterior distributions of the  $v_{\text{coeff}}$  parameters of the three sessions. f) Pairwise difference distributions between the  
1013 posterior distributions of the  $v_{\text{max}}$  parameters of the three sessions.

1014

1015 **Figure 5.** Posterior distributions of the remaining parameters of the DDM<sub>S</sub> model. Colored bars represent the corresponding  
1016 95% HDIs. a) Posterior distributions of the  $\tau$  parameter (non-decision time) for all three sessions. b) Posterior distributions of  
1017 the  $\alpha$  parameter (separation between decision boundaries). c) Posterior distributions of the  $z$  parameter (bias towards one  
1018 decision option). d) Pairwise difference distributions between the posterior distributions of the  $\tau$  parameters of the three  
1019 sessions. e) Pairwise difference distributions between the posterior distributions of the  $\alpha$  parameters of the three sessions. f)  
1020 Pairwise difference distributions between the posterior distributions of the  $z$  parameters of the three sessions.

1021

1022 **Figure 6.** Results of the EDA measurements divided into 15 time points over the course of the baseline phase, measured  
1023 before participants entered the VR-environments, and the first and second exploration phases. Each of the three phases is  
1024 divided into five one-minute bins (B1-5: pre-VR baseline, F1-5: first exploration phase in VR, S1-5: second exploration  
1025 phase VR). a: Median percent change from baseline mean for no. of spontaneous SCRs over all participants. b: Boxplot of  
1026 percentage change from baseline mean for no. spontaneous SCRs over all participants. c: Median percent change from  
1027 baseline mean of SCL over all participants. d: Boxplots of percentage change from base line mean of SCL over all  
1028 participants.

1029

1030 **Table 1.** Ranges for the uniform priors of group-level parameter means. Ranges were chosen to cover numerically plausible  
1031 values. Parameters included in multiple models are only listed once.

1032

1033 **Table 2.** 95% HDIs for the two parameters of the hyperbolic discounting model. HDIs are described by the min. value first  
1034 and the max value second. Directional Bayes Factors (dBF) are calculated as  $BF = i/(1-i)$ , with  $i$  being the probability mass of  
1035 the difference distributions above zero. Effect sizes are given as Cohen's  $d$ .

1036

1037 **Table 3.** Summary of the results of the ICC analysis for the AUC values as well as the two parameters of the hyperbolic  
1038 discounting model with a softmax choice rule. Lower and upper bound describe the 95% confidence interval.

1039

1040 **Table 4.** Summary of the DICs of all DDM models in all sessions. Ranks are based on the lowest DIC in all sessions.

1041

1042 **Table 5.** Directional Bayes Factors (dBF) and effect sizes (Cohen's  $d$ ) for all between session comparisons for all parameters  
1043 of the DDM<sub>S</sub>. Means and HDIs of the posteriors and difference distributions are summarized in the supplementary materials  
1044 (Supplementary Table S1). BFs are calculated as  $BF = i/(1-i)$ , with  $i$  being the probability mass of the difference distributions  
1045 above zero.

1046

1047 **Table 6.** Summary of the results of the ICC analysis of the DDM<sub>S</sub> parameters.

1048 **Supplementary Materials**

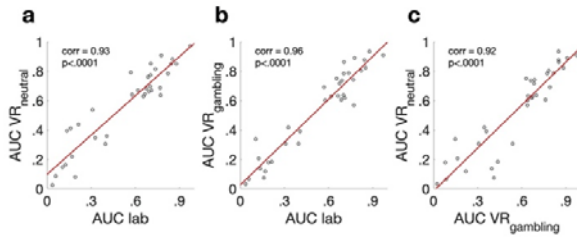

1049

1050 **Supplementary Figure S1.** Scatterplots of the individual participants AUC values. a) lab vs VR<sub>neutral</sub> b) lab vs VR<sub>gambling</sub> c)  
1051 VR<sub>gambling</sub> vs VR<sub>neutral</sub>.

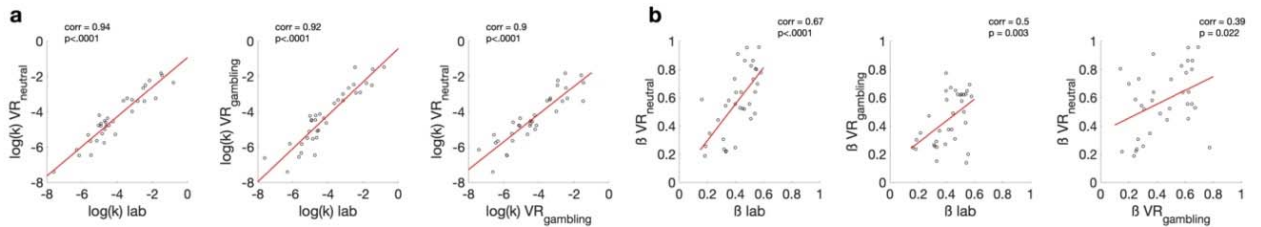

1052

1053 **Supplementary Figure S2.** Scatterplots of the mean of the individual participants parameter posterior distributions for the  
1054 parameters of the hyperbolic discounting model with the softmax choice rule (see equation 1 and 2). a)  $\log(k)$  b) softmax  $\beta$ .

1055

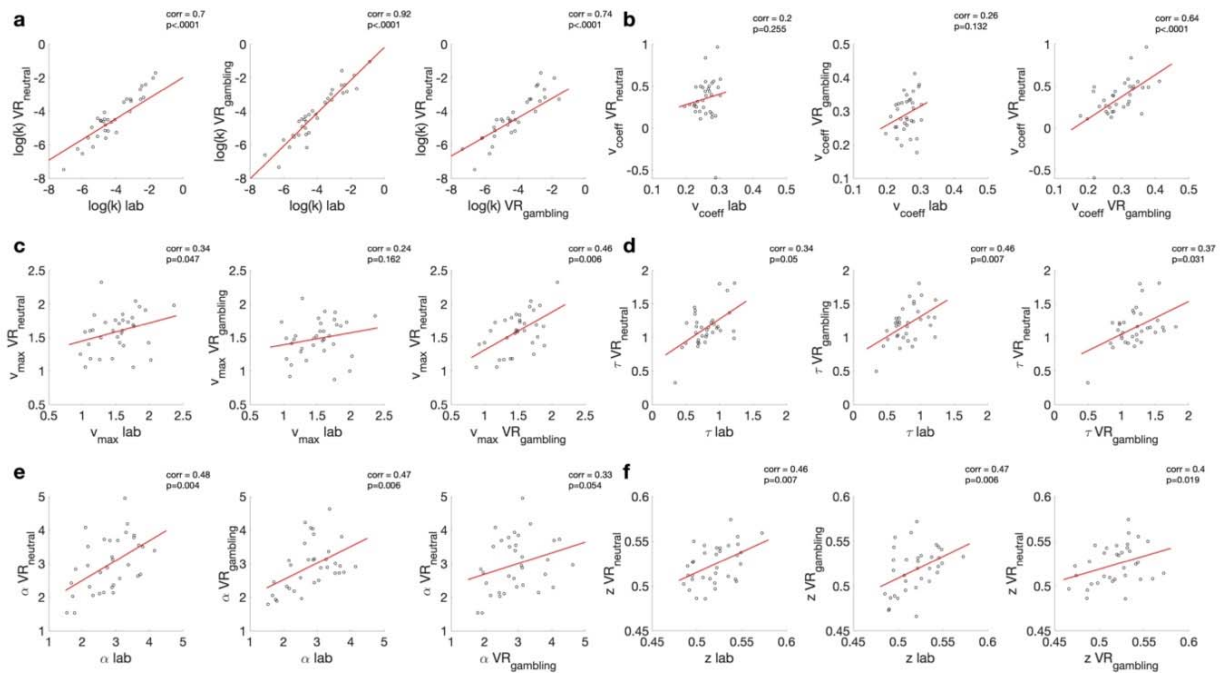

1056

1057 **Supplementary Figure S3.** Scatterplots of the mean of the individual participants parameter posterior distributions for the  
1058 parameters of the DDM<sub>S</sub> temporal discounting model. a)  $\log(k)$  b)  $v_{\text{coeff}}$  c)  $v_{\text{max}}$  d) tau e)  $\alpha$  f) z.

**Supplementary Table S1.** Means and 95% HDIs of the posteriors of the parameters from the DDM<sub>g</sub> model.

| Session                                           | Log(k) |        | vcoeff |       | vmax  |       | $\tau$ |       | $\alpha$ |       | $z$   |       |        |       |       |       |       |      |
|---------------------------------------------------|--------|--------|--------|-------|-------|-------|--------|-------|----------|-------|-------|-------|--------|-------|-------|-------|-------|------|
|                                                   | Mean   | HDI    | Mean   | HDI   | Mean  | HDI   | Mean   | HDI   | Mean     | HDI   | Mean  | HDI   |        |       |       |       |       |      |
|                                                   |        |        |        |       |       |       |        |       |          |       |       |       |        |       |       |       |       |      |
| <b>Lab</b>                                        | -4.051 | -4.57  | -3.54  | .26   | .22   | .306  | 1.516  | 1.362 | 1.677    | .806  | .724  | .889  | 2.806  | 2.545 | 3.073 | .519  | .502  | .537 |
| <b>VR<sub>neutral</sub></b>                       | -4.474 | -5.012 | -3.95  | .352  | .238  | .491  | 1.588  | 1.428 | 1.756    | 1.145 | 1.041 | 1.249 | 2.978  | 2.671 | 3.293 | 0.524 | .506  | .542 |
| <b>VR<sub>gambling</sub></b>                      | -4.16  | -4.698 | -3.626 | .292  | .244  | .351  | 1.484  | 1.342 | 1.636    | 1.197 | 1.099 | 1.294 | 2.921  | 2.648 | 3.199 | .518  | .499  | .537 |
| <b>Lab-VR<sub>neutral</sub></b>                   | .422   | -.309  | 1.16   | -.093 | -.237 | .0305 | -.072  | -.3   | .157     | -.339 | -.471 | -.207 | -.173  | -.585 | 0.236 | -.005 | -.03  | .02  |
| <b>Lab-VR<sub>gambling</sub></b>                  | .108   | -.628  | .849   | -.033 | -.104 | .034  | .032   | -.181 | .247     | -.391 | -.516 | -.265 | -.115  | -.497 | 0.266 | .001  | -.025 | .027 |
| <b>VR<sub>gambling</sub>-VR<sub>neutral</sub></b> | .314   | -.434  | 1.072  | -.06  | -.208 | .069  | -.104  | -.324 | .115     | .052  | -.091 | .194  | -0.058 | -.473 | .357  | -.006 | -.032 | .02  |

1059 **Supplementary Table S2.** Summary of the results of the ICC analysis of the DDM<sub>L</sub> parameters.

| <b>Parameter</b>                       | <b>ICC</b> | <b>p</b> | <b>Lower bound</b> | <b>Upper Bound</b> |
|----------------------------------------|------------|----------|--------------------|--------------------|
| <b>log(k)</b>                          | .92        | <.001    | .88                | .95                |
| <b><math>\nu_{\text{coeff}}</math></b> | .65        | <.001    | .5                 | .77                |
| <b><math>\tau</math></b>               | .15        | .067     | -.014              | .35                |
| <b><math>\alpha</math></b>             | .36        | <.001    | .19                | .55                |
| <b><math>z</math></b>                  | .60        | <.001    | .45                | .74                |

1060

1061 **Supplementary Table S3.** Summary of the results of the split-half ICC analysis of the DDM<sub>S</sub> parameters within the lab-  
1062 session.

| <b>Parameter</b>                       | <b>ICC</b> | <b>p</b> | <b>Lower bound</b> | <b>Upper Bound</b> |
|----------------------------------------|------------|----------|--------------------|--------------------|
| <b>log(k)</b>                          | .97        | <.001    | .96                | .97                |
| <b><math>\nu_{\text{coeff}}</math></b> | .25        | .069     | -.029              | .5                 |
| <b><math>\nu_{\text{max}}</math></b>   | .76        | <.001    | .61                | .86                |
| <b><math>\tau</math></b>               | .92        | <.001    | .86                | .95                |
| <b><math>\alpha</math></b>             | .94        | <.001    | .9                 | .97                |
| <b><math>z</math></b>                  | .48        | .002     | .23                | .67                |

1063

1064 **Supplementary Table S4.** Summary of the results of the split-half ICC analysis of the DDM<sub>S</sub> parameters within the  
1065 VR<sub>neutral</sub>-session.

| <b>Parameter</b>                       | <b>ICC</b> | <b>p</b> | <b>Lower bound</b> | <b>Upper Bound</b> |
|----------------------------------------|------------|----------|--------------------|--------------------|
| <b>log(k)</b>                          | .73        | <.001    | .57                | .84                |
| <b><math>\nu_{\text{coeff}}</math></b> | .005       | .49      | -.092              | .29                |
| <b><math>\nu_{\text{max}}</math></b>   | .65        | <.001    | .46                | .79                |
| <b><math>\tau</math></b>               | .94        | <.001    | .9                 | .97                |
| <b><math>\alpha</math></b>             | .9         | <.001    | .82                | .94                |
| <b><math>z</math></b>                  | .25        | .075     | -.036              | .49                |

1066

1067

1068

1069

1070

1071

1072 **Supplementary Table S5.** Summary of the results of the split-half ICC analysis of the DDM<sub>s</sub> parameters for the parameters  
1073 within the VR<sub>gambling-session</sub>.

| <b>Parameter</b>         | <b>ICC</b> | <b>p</b> | <b>Lower bound</b> | <b>Upper Bound</b> |
|--------------------------|------------|----------|--------------------|--------------------|
| <b>log(k)</b>            | .96        | <.001    | .56                | .8                 |
| <b>v<sub>coeff</sub></b> | -.1        | .73      | -.053              | .3                 |
| <b>v<sub>max</sub></b>   | .58        | <.001    | .16                | .52                |
| <b>τ</b>                 | .94        | <.001    | .019               | .38                |
| <b>α</b>                 | .92        | <.001    | .24                | .59                |
| <b>z</b>                 | .36        | .016     | .22                | .58                |

1074
